1 **Title: Speed, accuracy, sensitivity and quality control choices for detecting clinically**  
2 **relevant microbes in whole blood from patients**

3

4 **Short title:** Detecting pathogens in clinically relevant samples

5

6 **Authors:** James Thornton Jr.<sup>2\*</sup>, George S. Watts<sup>1\*</sup>, Ken Youens-Clark<sup>2</sup>, Lee D. Cranmer<sup>3</sup>, and  
7 Bonnie L. Hurwitz<sup>2,4†</sup>

8

9 **Affiliations:**

10 <sup>1</sup>The University of Arizona Cancer Center and Department of Pharmacology, The University of  
11 Arizona, Tucson, AZ, USA

12 <sup>2</sup>Department of Biosystems Engineering, The University of Arizona, Tucson, AZ, USA

13 <sup>3</sup>Department of Medicine at the University of Washington, Fred Hutchinson Cancer Research  
14 Center, and Seattle Cancer Care Alliance, Seattle, WA, USA

15 <sup>4</sup>BIO5 Institute, The University of Arizona, Tucson, AZ, USA

16 \*These authors contributed equally to this work.

17 † To whom correspondence should be addressed

18

19 **Corresponding author:** [bhurwitz@email.arizona.edu](mailto:bhurwitz@email.arizona.edu)

## 20 **ABSTRACT**

21  
22 Infections are a serious health concern worldwide, particularly in vulnerable populations  
23 such as the immunocompromised, elderly, and young. Advances in metagenomic sequencing  
24 availability, speed, and decreased cost offer the opportunity to supplement or replace culture-  
25 based identification of pathogens with DNA sequence-based diagnostics. Adopting metagenomic  
26 analysis for clinical use requires that all aspects of the pipeline are optimized and tested,  
27 including data analysis. We tested the accuracy, sensitivity, and resource requirements of  
28 Centrifuge within the context of clinically relevant bacteria. Binary mixtures of bacteria showed  
29 Centrifuge reliably identified organisms down to 0.1% relative abundance. A staggered mock  
30 bacterial community showed Centrifuge outperformed CLARK while requiring less computing  
31 resources. Shotgun metagenomes obtained from whole blood in three febrile neutropenia patients  
32 showed Centrifuge could identify both bacteria and viruses as part of a culture-free workflow.  
33 Finally, Centrifuge results changed minimally by eliminating time-consuming read quality  
34 control and host screening steps.

35  
36  
37

## 37 **AUTHOR SUMMARY**

38  
39 Immunocompromised patients, such as those with febrile neutropenia (FN), are  
40 susceptible to infections, yet cultures fail to identify causative organisms ~80% of the time.  
41 High-throughput metagenomic sequencing offers a promising approach for identifying pathogens  
42 in clinical samples. Mining through metagenomes can be difficult given the volume of reads,  
43 overwhelming human contamination, and lack of well-defined bioinformatics methods. The goal  
44 of our study was to assess Centrifuge, a leading tool for the identification and quantitation of  
45 microbes, and provide a streamlined bioinformatics workflow real-world data from FN patient

46 blood samples. To ensure the accuracy of the workflow we carefully examined each step using  
47 known bacterial mixtures that varied by genetic distance and abundance. We show that  
48 Centrifuge reliably identifies microbes present at just 1% relative abundance and requires  
49 substantially less computer time and resource than CLARK. Moreover, we found that Centrifuge  
50 results changed minimally by quality control and host-screening allowing for further reduction in  
51 compute time. Next, we leveraged Centrifuge to identify viruses and bacteria in blood draws for  
52 three FN patients, and confirmed suspected pathogens using genome coverage plots. We  
53 developed a web-based tool in iMicrobe and detailed protocols to promote re-use.

54

## 55 INTRODUCTION

56  
57       The current gold standard for clinical diagnosis of infections relies on isolating organisms  
58 by culture-based methods followed by identification and drug resistance testing. Methods for  
59 identifying pathogens that rely on culture have several drawbacks including fastidious bacteria,  
60 the time required for growth in culture, and the difficulty targeting viruses, fungi, and parasites.  
61 Identifying pathogens directly from biological samples by DNA sequencing can overcome the  
62 above limitations of culture and may improve the rate and speed of diagnosis. For these reasons,  
63 metagenomic shotgun sequencing of pathogens has been referred to as the holy grail of infection  
64 diagnosis (Ecker et al., 2010). While culturing samples is the current standard for infection  
65 diagnosis, it can have a high failure rate in some scenarios. For example, a study examined the  
66 problem of culture-based diagnosis of infection in febrile neutropenia and found that only ~16%  
67 (609 of 3,756) febrile neutropenia patients were culture positive (van Walraven & Wong, 2014).  
68 Also, the hazard ratio of dying was nearly four-fold higher in culture-negative patients than for  
69 patients where no culture was taken (presumably due to lack of fever), indicating the high cost in  
70 lives when cultures fail. Therefore, we seek to apply metagenomic sequencing to overcome the  
71 low rate and time delay of culture-based diagnostic methods in clinical settings such as febrile  
72 neutropenia.

73       The potential of metagenomic shotgun sequencing has been demonstrated in a broad  
74 range of infection scenarios including: leptospirosis (Wilson et al., 2014), nosocomial  
75 transmission of a drug-resistant bacteria (Snitkin et al., 2012), foodborne illness (Ashton et al.,  
76 2015), and infectious disease outbreaks (Quick et al., 2016). Despite successes using  
77 metagenomic shotgun sequencing to identify pathogens, routine application in clinical settings  
78 will require accurate, efficient classification, with minimized sample contamination. For

79 example, while a small group of studies have reported on high-throughput metagenomic  
80 sequencing for identifying pathogens from immunocompromised patients where samples were  
81 not enriched for microbes, resulting in less than 1% of reads being pathogen-specific (Naccache  
82 et al., 2014; Parize et al., 2017) and dramatically reducing the diagnostic possibilities from the  
83 data (Frey et al., 2014). To begin addressing these inefficiencies, we developed an approach to  
84 increase the proportion of pathogen-derived reads in samples and applied it to the patient  
85 samples reported here.

86 On the data analysis side, there are no standards for analysis of metagenomic data  
87 obtained from clinical samples; however, there have been recent innovations in taxonomic  
88 classification algorithms that make it possible to quantify microbial species directly from reads  
89 in metagenomic datasets rapidly. These algorithms use two main approaches to assign reads to  
90 species in a reference database including: (1) a mapping approach using a Burrows-Wheeler  
91 transform (Li & Durbin, 2009; M. Burrows, 1994) used by Centrifuge (Kim, Song, Breitwieser,  
92 & Salzberg, 2016) or (2) a pseudo-alignment approach based on discriminating k-mers used by  
93 CLARK (Ounit, Wanamaker, Close, & Lonardi, 2015a). These algorithms outperform local  
94 alignment methods concerning both speed and capacity and can, therefore, better handle the  
95 number of reads in metagenomes (Bazinet & Cummings, 2012; Ounit, Wanamaker, Close, &  
96 Lonardi, 2015b; Rosen, Reichenberger, & Rosenfeld, 2011; Wood & Salzberg, 2014). However,  
97 comparisons between these algorithmic approaches to determine the accuracy of taxonomic  
98 assignment in clinically relevant metagenomes are lacking.

99 Here we report the accuracy and sensitivity of Centrifuge utilizing defined clinically  
100 relevant samples, compare its performance to CLARK, and finally analyze datasets obtained  
101 from patients following depletion of human cells to enrich for pathogen DNA. Lastly, we test the

102 effect of excluding quality control and host-screening by alignment on the classification of reads  
103 by Centrifuge. This work provides a foundation for analysis of metagenomic data from clinical  
104 samples enriched for pathogens which use open-source software, requires a minimal  
105 computational resource, and provides rapid and accurate identification of pathogens. Our  
106 approach is freely available as web-based Apps in iMicrobe. Further, we provide the source code  
107 in GitHub: [https://github.com/hurwitzlab/Centrifuge\\_HPC](https://github.com/hurwitzlab/Centrifuge_HPC) under the GNU open source license.

## 108 109 **RESULTS**

### 110 111 **Centrifuge accuracy and sensitivity in controlled mixtures of bacteria**

112  
113 Because closely related clinically important bacteria can have diametric clinical  
114 consequences, (e.g., *E. coli* is a normal commensal while *S. flexneri* causes dysentery), we  
115 sought to test Centrifuge's appropriateness as a tool for analyzing clinically relevant bacterial  
116 sequence datasets. We tested the linearity and threshold for detection of Centrifuge using three  
117 sets of bacterial mixtures, selected to represent taxonomic distances from phylum to genus-level.  
118 We created dilution mixtures over a six-log range of relative abundance with each organism  
119 ranging from 0.1% to 99.9% of the mixture (Figure 1). Centrifuge correctly identified all four  
120 species in the mixtures and misidentified less than one percent of the reads in any of the 18  
121 combinations sequenced (false positives, Figure 1). Centrifuge was sensitive to the lowest  
122 relative abundance (0.1%) in four out of six opportunities, failing to detect the extremes in the *E.*  
123 *coli/S. saprophyticus* mixture. Reads matching phage present in the mixtures were classified and  
124 quantitated by Centrifuge separately from their host genomes. Because the phage relative  
125 abundance estimates were not included with their host, the bacteria present were underestimated  
126 so that the abundance estimates shown in Figure 1 do not add to 100%. The clearest example of  
127 phage matches affecting taxon-assignment is in the mixture composed of 99.9% *S. pyogenes*

128 with an estimated relative *abundance of Streptococcus*-specific phage at 10.14%. Despite the  
129 effect of phage matches, the coefficient of determination ( $R^2$ ) for the three mixtures was 0.90 for  
130 *E. coli/S. flexneri*, 0.99 for *S. saprophyticus/S. pyogenes*, and 0.96 for *E. coli/S. saprophyticus*.  
131 Importantly, Centrifuge was able to discriminate between organisms as difficult to discriminate  
132 as *E. coli* and *S. flexneri*.  
133

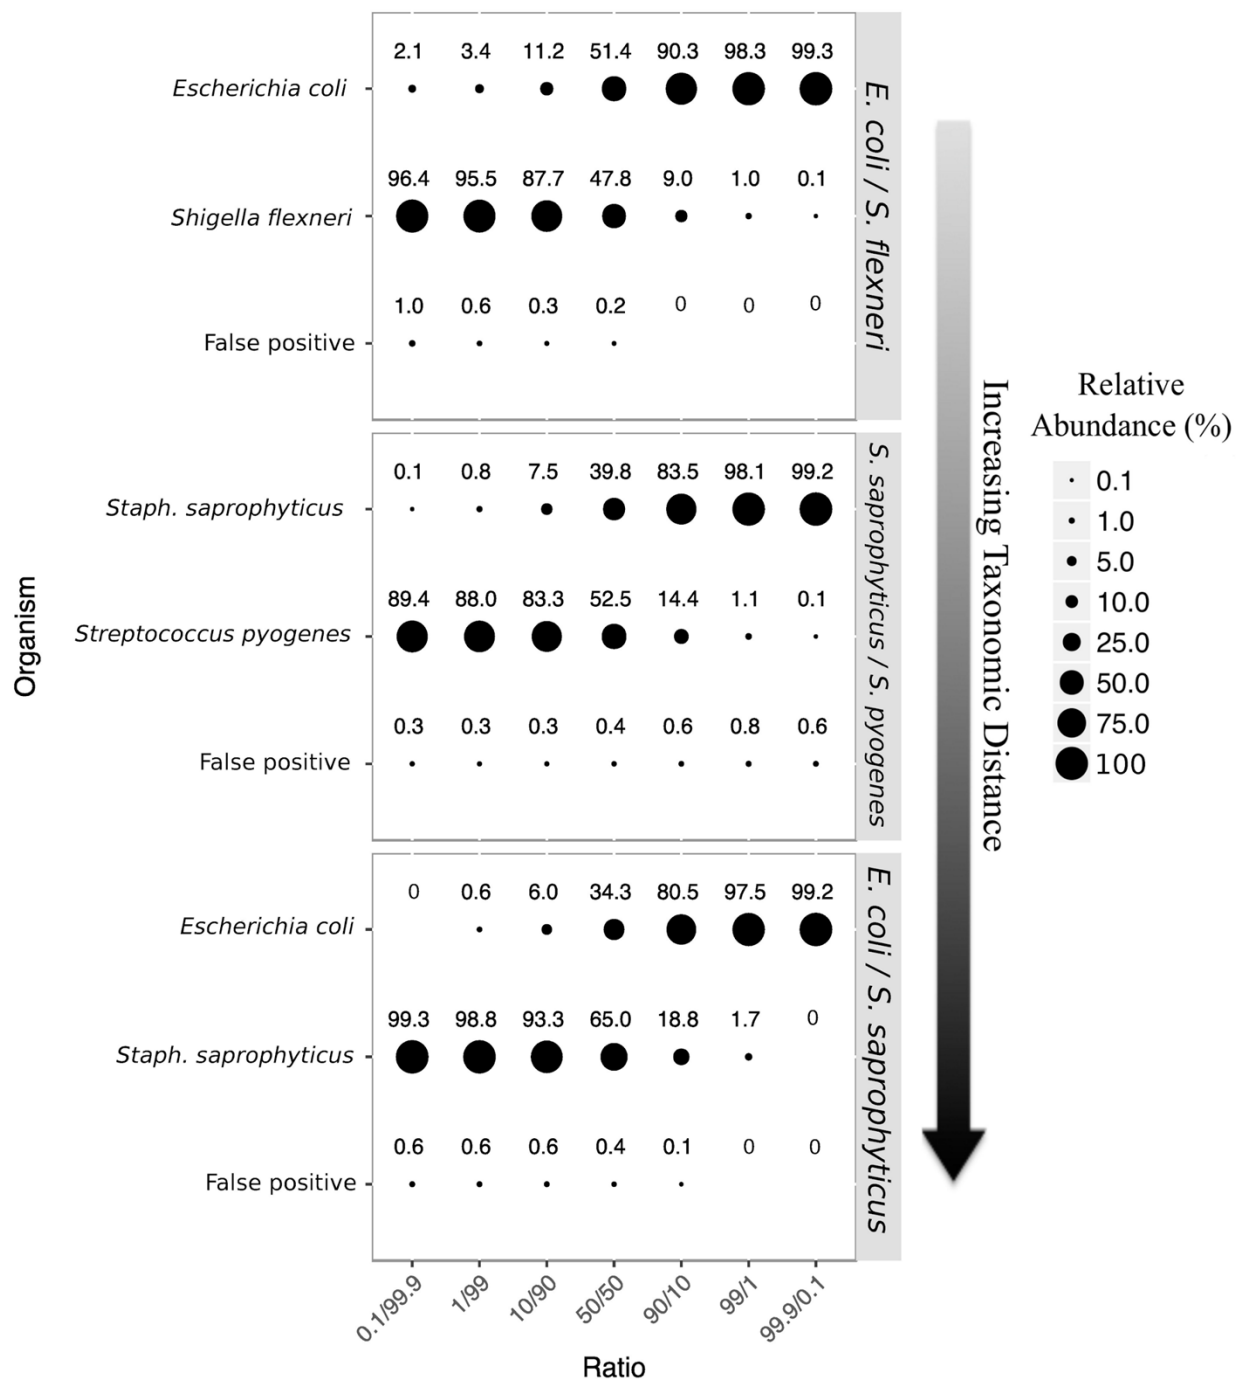

134  
 135  
 136 **Fig 1. Linearity and threshold for detection of binary mixtures of bacteria using**  
 137 **Centrifuge.** The relative abundance of organisms calculated by Centrifuge is represented by  
 138 circle size with actual values displayed above, values that are zero have no circle.

139



## 140 **Comparing the accuracy of Centrifuge and CLARK with a bacterial mock community**

141           Given Centrifuge's performance on the binary mixtures, it was next compared to a  
142 leading algorithm of another class, CLARK with a more complex mock community of 20  
143 bacteria present in varying relative abundances. Both CLARK and Centrifuge identified the 20  
144 known bacterial species in the mock community; however, CLARK reported five false positives  
145 (two *Shigella sp.*, two *Staphylococcus sp.* and *Corynebacterium pseudotuberculosis*) that were  
146 not present in the mock community. In contrast to CLARK, Centrifuge did not produce any false  
147 positives. To compare the two algorithms (Centrifuge and CLARK), we graphed the relative  
148 abundance of 20 organisms in a mock community against their known abundance and calculated  
149 R<sup>2</sup> values (Figure 2). Centrifuge and CLARK had nearly identical R<sup>2</sup> values of 0.98 and 0.97  
150 respectively. Overall, both tools tended to overestimate relative abundance values, especially the  
151 lowest abundances: most estimated abundances fell below the perfect fit represented by the  
152 dotted line in Figure 2. Importantly, both algorithms were able to identify the presence of all four  
153 organisms in the mock community with relative abundances of 0.01%.

154

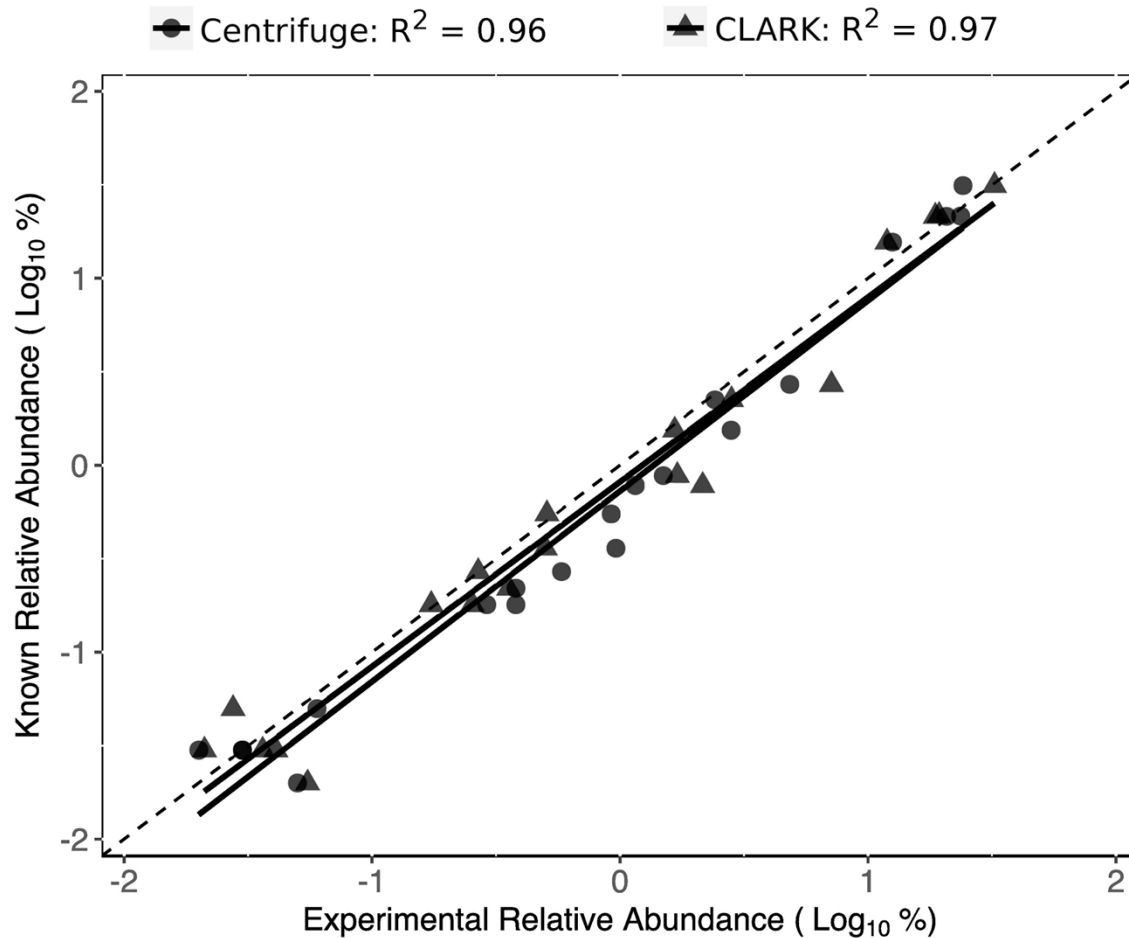

155  
156

157 **Fig 2. Centrifuge and CLARK relative abundance estimates versus expected for a mock**  
158 **community of 20 bacteria.** Relative abundances estimated by CLARK and Centrifuge graphed  
159 against the expected values. The black dotted line represents perfect correlation with known  
160 relative abundances. The trendlines for CLARK and Centrifuge are shown in solid black lines.

161

### 162 **Centrifuge requires less computational resources than CLARK**

163 While CLARK had nearly identical accuracy in relative abundance estimates as  
164 Centrifuge (despite five positive identifications), there was a striking difference between the two  
165 classification algorithms in the computation resources and time required to analyze the data.

166 Relative to CLARK, Centrifuge required less than a tenth of the memory and a quarter of the  
167 runtime, while using half the number of central processing units (Table 1).

168

169 **Table 1. Comparison of computational resources required by Centrifuge and CLARK to**  
170 **analyze the bacterial mock community dataset.** CPU, central processing unit; GB, gigabyte;  
171 RAM, random access memory.

| <b>Program</b>    | <b>number of CPUs</b> | <b>RAM (GB)</b> | <b>Runtime (hr:min:sec)</b> |
|-------------------|-----------------------|-----------------|-----------------------------|
| <b>Centrifuge</b> | <b>12</b>             | <b>23</b>       | <b>0:07:40</b>              |
| <b>CLARK</b>      | <b>28</b>             | <b>297</b>      | <b>0:38:40</b>              |

172

173 **Identification of pathogens in whole blood from febrile neutropenia patients.**

174 Pathogens were enriched using a simple sample preparation method from whole blood  
175 samples drawn from three patients with febrile neutropenia, and the resulting metagenomic DNA  
176 sequenced. Table 2 shows the starting number of raw reads and the percent passing through each  
177 step from quality control, to host-screening by alignment, and finally Centrifuge analysis. The  
178 reads classified by Centrifuge identified three likely pathogens: *Pseudomonas fluorescens* with a  
179 relative abundance of 50.7% in patient 1, Human parvovirus with a relative abundance of 99.8%  
180 in patient 2, and Torque teno virus in patient 3 with a relative abundance of 62.8% (Figure 3).

181 Comparing the percentages shown in Table 2 with the relative abundances calculated by  
182 Centrifuge for these organisms showed how the small genome sizes of the two viruses gave their  
183 genomes more weight in the relative abundance estimates. For example, Torque Teno Virus had  
184 an abundance estimate of 72.8% though only 9.4% of the total post-quality control reads mapped  
185 to this organism.

186           Blood culture results for all three patients were negative, at the time of sample collection  
187 and in two subsequent blood cultures of each patient. Thus, the sequencing results were not  
188 compared to culture, the current gold standard. However, patient two did have a positive PCR  
189 test for human parvovirus in the month before and after the research sample was obtained,  
190 corroborating the results obtained with Centrifuge. Additional corroboration of the results comes  
191 from analysis of 12 samples obtained from two healthy volunteers over a six-week period in  
192 which none of the likely pathogens seen in the febrile neutropenia patients was observed (data  
193 not shown). While *Pseudomonas fluorescens* has been reported as a false positive in other  
194 studies, the fact that it did not appear in the healthy volunteer samples and is known to infect  
195 immunocompromised individuals (Wong et. al., 2011) suggests that it is not an artifact in patient  
196 1 (. We also identified human endogenous retrovirus K113 and *Cutibacterium acnes* (also known  
197 as *Propionibacterium acnes*) in patients 1 and 3, however these organisms were deemed to be  
198 contaminants: the virus is endogenous, *C. acnes* is a common contaminant of blood samples  
199 (Mollerup et al., 2016; Parize et al., 2017; Park et al., 2011), and both were present in the normal  
200 samples collected over 6 weeks.

201  
202  
203  
204  
205  
206  
207  
208  
209  
210  
211  
212

213

214

215 **Table 2.** Read counts following each step of the Centrifuge analysis of febrile neutropenia

216 datasets. QC, quality control.

| Pt | Raw Reads <sup>a</sup> | Post QC <sup>b</sup> | Human (%) <sup>c</sup> | Centrifuge                |                             |                          |
|----|------------------------|----------------------|------------------------|---------------------------|-----------------------------|--------------------------|
|    |                        |                      |                        | Unmapped (%) <sup>d</sup> | Classified (%) <sup>e</sup> | Unknown (%) <sup>f</sup> |
| 1  | 3,497,123              | 61.9                 | 57.3                   | 42.7                      | 70.2                        | 29.8                     |
| 2  | 13,000,518             | 43.9                 | 41.3                   | 58.7                      | 34.8                        | 64.2                     |
| 3  | 18,839,275             | 43.4                 | 79.1                   | 20.9                      | 45.4                        | 54.6                     |

217 <sup>a</sup> Total reads generated from the sample.

218 <sup>b</sup> Percent of reads remaining after quality control.

219 <sup>c</sup> Percent of Post-QC reads that mapped to the human genome.

220 <sup>d</sup> Percent of Post-QC reads that did not map to the human genome.

221 <sup>e</sup> Percent of unmapped reads that were assigned a taxonomic classification by Centrifuge.

222 <sup>f</sup> Percentage of unmapped reads that were not assigned a taxonomic classification by Centrifuge.

223

224

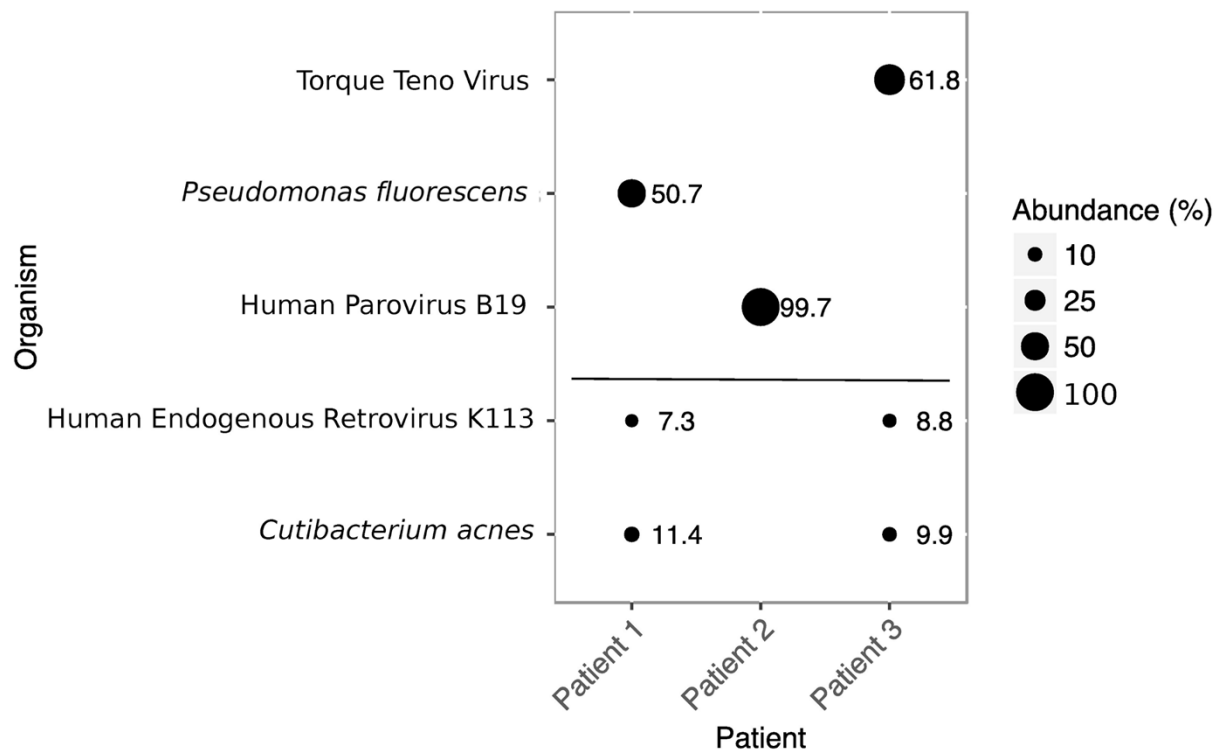

225  
226  
227

228 **Fig 3. Identification and relative abundance of pathogens in febrile neutropenia samples.**

229 Circle size indicates the relative abundance of the respective organism, and actual abundance  
230 values are next to the circles. Organisms deemed endogenous or common contaminants are  
231 separated from the presumed pathogens by the horizontal line.

232

### 233 **Genome coverage of suspected pathogens in febrile neutropenic patients**

234 Reads from the three febrile neutropenia samples were aligned to the respective reference  
235 genomes of the suspected pathogens to determine average depth of coverage (Figure 4). When  
236 patient 1 reads were aligned to the *Pseudomonas fluorescens* genome, the average coverage was  
237 7.0. Patient 2 reads aligned to the Human Parvovirus B19 genome showed average coverage of  
238 5,180. Finally, patient 3 reads aligned to the Torque Teno Virus (TTV) genome showed high  
239 coverage (~8,000) for a ~500 base pair region of the genome.

240

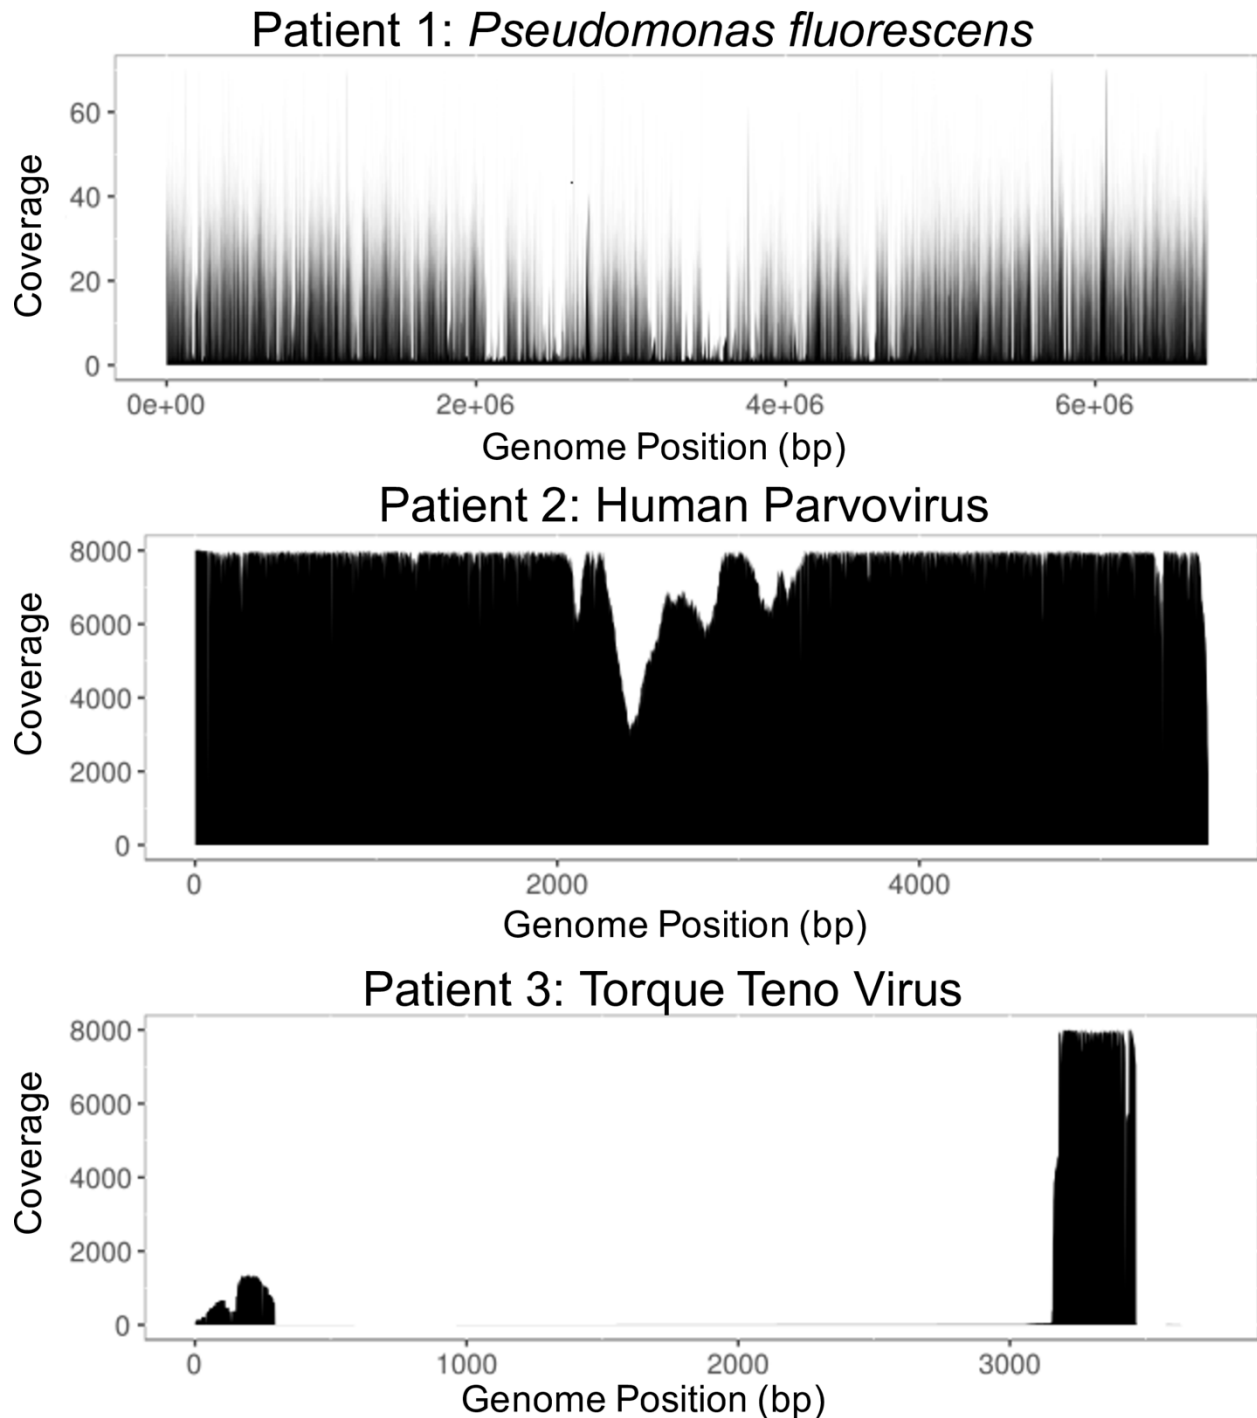

241

242

243 **Fig 4. Genome coverage of suspected pathogens identified in febrile neutropenia patients**

244 **by Centrifuge.** Coverage by each base is graphed relative to the position in the three respective

245 genomes of likely pathogens identified in three febrile neutropenia patients.

246

247 **Effect of quality controlling reads on computation time and Centrifuge's accuracy**

248 Sequencing reads are typically subjected to a series of quality control steps including  
249 trimming low-quality bases from reads, removing short reads, deduplication, and trimming ends  
250 with unbalanced nucleotide composition before downstream applications (e.g., variant calling, or  
251 sequence assembly). When quality control steps were performed before the Centrifuge analyses  
252 in Figures 2 and 3, they accounted for approximately half the compute time required to achieve  
253 results (data not shown). The fact that quality controls steps accounted for so much of the  
254 compute time, led to the question of what effect quality control had on the taxonomic  
255 classifications and relative abundance estimates made by Centrifuge. To answer this question,  
256 the mock bacterial community data was analyzed in Centrifuge with and without quality  
257 controlling the reads first. Results showed only one difference in taxonomic classification: a false  
258 positive (*Bacillus thuringiensis*) was identified with a relative abundance of 2.9% without quality  
259 control (Figure 5). Linear regression of the measured versus expected relative abundances  
260 showed that the  $R^2$  with quality control was 0.97 and without quality control was 0.97, further  
261 demonstrating how little effect there was on the Centrifuge results.

262



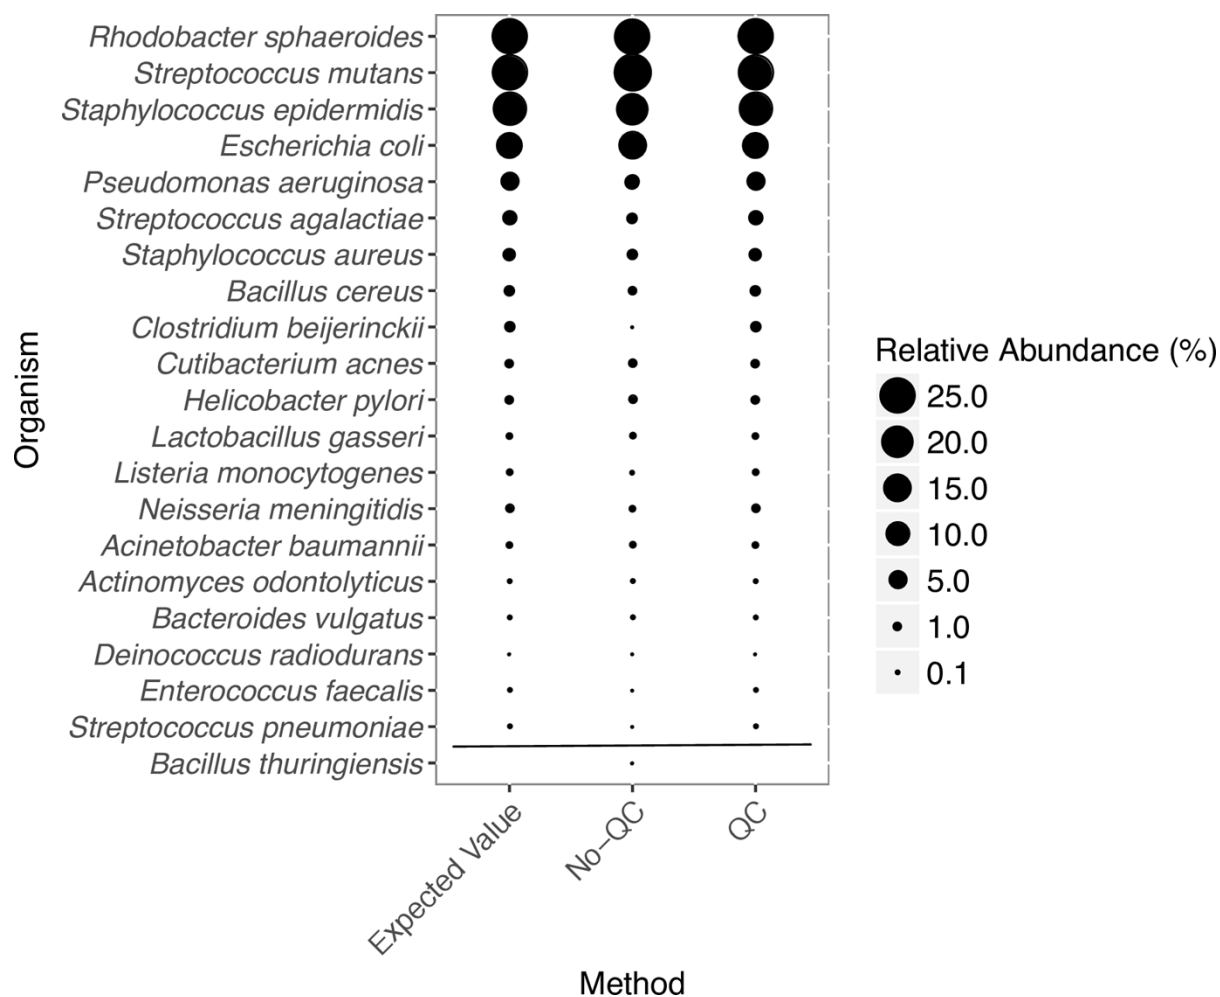

263  
 264  
 265 **Fig 5. Bacterial mock community taxonomic identification and relative abundance by**  
 266 **Centrifuge with and without quality control of the input sequence reads.** Organisms are  
 267 ranked by their relative abundance which is indicated by the size of the circle. The false positive  
 268 (*Bacillus thuringiensis*) identified from reads without quality control (QC) is shown at the  
 269 bottom.

270  
 271 **Host read removal by alignment versus in Centrifuge**

272 Host DNA contamination can contribute to a significant proportion, or even the vast  
 273 majority, of reads in metagenomic datasets, and is often removed by mapping reads to the host  
 274 genome (Schmieder & Edwards, 2011). In performing taxonomic classification of reads,

275 Centrifuge determines whether reads are of human origin (or other hosts), thus calling into  
276 question the necessity of aligning reads to the host genome and removing them, before analysis.  
277 Figure 6A shows the relative amount of reads that were classified as human, microbial, or  
278 unknown when the datasets were analyzed by Centrifuge without removing reads by alignment  
279 to the human genome before analysis. The relative proportion of host (human) reads in the data  
280 agreed well with the proportions found by alignment (see Table 2). While the proportion of host  
281 DNA was less than in prior studies, suggesting that the enrichment for pathogen DNA used in  
282 this study was successful, a significant proportion of the reads were still human.

283       Having established that a significant proportion of the reads in the datasets were of host  
284 origin by both alignment and Centrifuge, we compared three approaches for removing host reads  
285 in the febrile neutropenia patient data. These methods include (1) alignment to the human  
286 genome and removal of aligned reads from the dataset, (2) removing the human sequence from  
287 the reference database, and (3) using the "exclude TaxID" function in Centrifuge to exclude  
288 reads from classification whose best match was to the human genome. Overall, exclusion of the  
289 human genome from the reference database resulted in the highest number of reads classified to  
290 the presumed pathogens; however, the differences between the methods were relatively minor  
291 (Figure 6B). Patient 3, with a presumed pathogen of Torque Teno virus, showed the least effect  
292 on the number of reads classified, with less than a 411 read difference (<1%) between the  
293 number of reads classified between the three methods. In contrast, patient 2, with a presumed  
294 pathogen of Human Parvovirus B19, had 124,544 fewer reads classified (9.7%) when reads  
295 removed by alignment relative to the removal of reads that match the human genome from the  
296 database. Finally, patient 1, with a presumed pathogen of *P. fluorescens*, showed 26,836 fewer

297 reads classified (4.5%) when reads were removed by alignment relative to being present in the  
298 database.

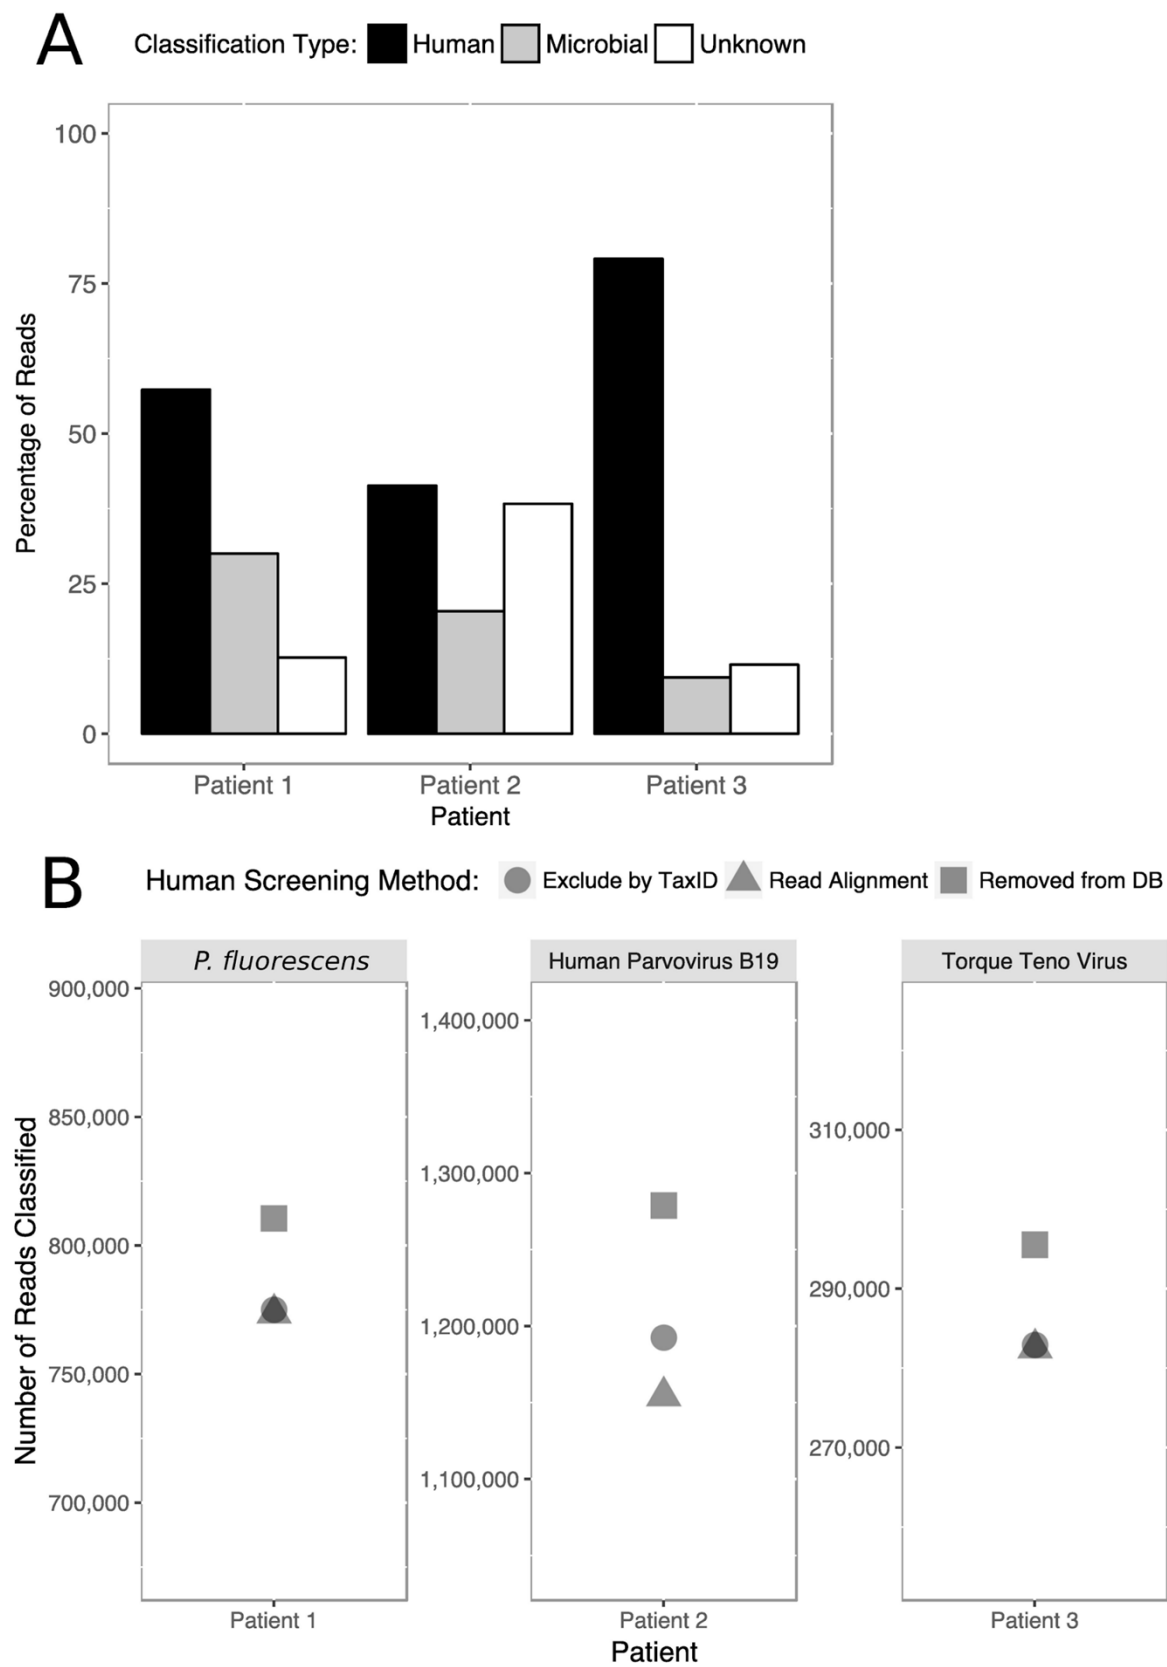

299  
300

301 **Fig 6. Effect of mapping reads from patient samples against the human genome.** A) Percent  
302 of reads classified as human, microbial, or unknown for each febrile neutropenia patient by  
303 Centrifuge. B) Number of reads classified in each presumed pathogen following three strategies  
304 for host screening: removal of the human genome from the reference database (Removed from  
305 DB, squares), excluding the human TaxID in Centrifuge (Exclude by TaxID, circles), and  
306 aligning against the human genome before analysis (Read Alignment, triangles).

307

## 308 **DISCUSSION**

309

### 310 **Centrifuge accuracy of identification and quantitation with known samples**

311 Immunocompromised patients, such as those with febrile neutropenia, are susceptible to  
312 infections. The current standard for identifying pathogens from clinical samples when infection  
313 is suspected can fail as much as ~80% of the time. Without diagnostic information, clinicians'  
314 first response is empirical antibiotic therapy in the hope that the organism is bacterial and  
315 covered by the antibiotic(s) given. Metagenomic sequencing of clinical samples offers an  
316 approach that bypasses the issues of culture, however, mining the resulting metagenomic  
317 sequence can be slow and error-prone given the volume of reads, host read contamination, and  
318 lack of well-defined bioinformatics methods. The goal of our study was to assess Centrifuge, a  
319 leading tool for identification and quantitation of metagenomic data, using clinically relevant  
320 datasets to establish its accuracy in microbial/viral identification and abundance estimates with  
321 an eye toward reducing compute time.

322 The first dataset used to assess Centrifuge was a series of binary bacterial mixtures  
323 chosen for their phylogenetic distance and mixed so that each pair was combined across six logs  
324 of relative abundance. Centrifuge was able to discriminate the most closely related pair of

325 bacteria, *E. coli* and *S. flexneri*, even when one of the organisms was present as 0.1% of the  
326 mixture. As the proportion of *E. coli* decreased, the relative abundance estimate diverged from  
327 expected, so that the *E. coli* estimate was 2.1% when *E. coli* was only 0.1% of the mixture. The  
328 same inaccuracy did not occur as the *S. flexneri* relative abundance decreased to 0.1%,  
329 suggesting Centrifuge misidentified a portion of the *S. flexneri* genome as *E. coli* but not the  
330 other way around. The difficulty classifying *S. flexneri* suggested by the fact that the false  
331 positive rate increased from 0% to 1%, the highest measured, as *S. flexneri* relative abundance  
332 increased. One likely cause for more relative matches to *E. coli* than *S. flexneri* is that *E. coli*  
333 strains and isolates represent the most substantial fraction of the Centrifuge reference database.  
334 False positive identification of *E. coli* using metagenomic methods has been previously  
335 observed. McIntyre et al. (2017) saw similar false positive identification of *E. coli* when using  
336 metagenomic classifiers on negative control sequences not belonging to any known  
337 organism (McIntyre et al., 2017). The researchers also speculated that the reason for the false  
338 positives is the overrepresentation of *E. coli* sequences in their reference dataset. Although  
339 Centrifuge uses a modified FM-index to condense closely related genomes, the total file size of  
340 basepairs maintained (unique + shared based on  $\geq 99\%$  identity) exceeds the relative file size of  
341 all other species (Kim et al., 2016) giving it a higher probability for matches. This result suggests  
342 that Centrifuge dampens the effect of multiple strains and isolate genomes using the modified  
343 FM-index, but the effect is still present for highly abundant strains.

344 Centrifuge appears to be capable of detecting organisms even when they are present in  
345 minor abundance, regardless of the phylogenetic distances between them. Overall, Centrifuge  
346 read abundances closely match the expected relative abundance of bacterial mixtures for closely  
347 and distantly related species. Interestingly, phylogenetic distance did not predict the accuracy of

348 relative abundance estimates. A reasonable assumption would be that as phylogenetic distance  
349 increases, the number of discriminatory k-mers increase to allow for better read classification by  
350 Centrifuge. Instead, we observed high classification accuracy for the most closely related pair (*E.*  
351 *coli/S. flexneri*) from the same family. Less accuracy for the next pair (*S. pyogenes/S.*  
352 *saprophyticus*) where both organisms were gram-positive and from the same phylogenetic class.  
353 The highest accuracy for the most distant pair (*E. coli/S. saprophyticus*) where one organism was  
354 gram-negative and the other gram-positive and only shared phylogenetic kingdom. Interestingly,  
355 *S. pyogenes* is closely related to many *Streptococcus* genomes which may have limited the  
356 number of distinguishing k-mers to classify reads at the species rather than genus level (data not  
357 shown).

358         We compared Centrifuge's performance against another leading k-mer based taxonomic  
359 classifier, CLARK, in analyzing sequence data from a more complex community of 20 bacteria.  
360 The mock community was also mixed in varying relative abundances as with the binary  
361 mixtures, albeit, in a different range (~0.01-35%). Abundance calculations between the two  
362 algorithms were nearly identical across the relative abundance range; however, the processing  
363 time and computational resources for CLARK were greater (Table 1). Also, CLARK had a  
364 propensity for false positives, whereas Centrifuge did not. On the other hand, Centrifuge's results  
365 had to be processed to account for the strain and phage-specific data generated. Such processing  
366 would be a necessary part of adoption in a clinical setting, but Centrifuge's lack of false positives  
367 and speed suggests it may be a good starting point for such a tool.

### 368         **Centrifuge identification and relative abundance estimates**

369 Centrifuge is unique from other taxonomic classifiers in that it provides Expectation –  
370 Maximization (EM) calculation to determine relative abundance, rather than just read

371 proportional classification. The EM calculation proves useful in determining relative abundance  
372 between organisms in samples with varying genome sizes. We demonstrated the benefit of  
373 calculating abundance using Centrifuge's EM algorithm in the analysis of the febrile neutropenia  
374 blood samples from patients 2 and 3 where viral matches were significantly underrepresented  
375 when using read proportional classifications.

376         One drawback for clinical pathogen identification is that Centrifuge separates strain-level  
377 counts, splitting reads among closely related strains which required manually summing strain  
378 level abundances for reporting. Future iterations of Centrifuge could address this issue re-  
379 analyzing the data with a reduced reference set of genomes based on the first round of analysis or  
380 a reduced reference database. Lastly, current reference databases do not account for all of the  
381 extant microbial/viral diversity that may be present in patients. However, this issue is being  
382 addressed over time with the exponential growth in the number of microbial draft genomes  
383 available (Land et al., 2015).

384

### 385 **Genome coverage of presumptive pathogens identified in patient samples**

386 We examined genome coverage statistics with the assumption that the genomes of the pathogens  
387 identified as the presumed cause of fever in the patients would be represented by consistent  
388 coverage, whereas uneven coverage could indicate insufficient evidence of organism presence.  
389 Parize et al. took a similar approach in which even distribution of contigs was used as part of the  
390 criteria to decide if a sample was deemed positive (Parize et al., 2017). Interestingly, the Torque  
391 Teno virus sequence found in patient 3 was observed to have high coverage of only a ~500 base  
392 pair untranslated region of the genome. This highly conserved region has been suggested to be  
393 critical for viral replication that may indicate an early replication event or the presence of



394 subviral particles, a characteristic that has previously observed in Torque Teno virus (de Villiers,  
395 Borkosky, Kimmel, Gunst, & Fei, 2011). The evidence for sub-viral particles provided by the  
396 coverage analysis is the first from an *in vivo* sample. Lastly, Torque Teno virus was identified in  
397 a cancer patient undergoing bone marrow ablation in preparation for a hematopoietic stem cell  
398 transplant as part of their cancer treatment. This finding highlights the possible value of the  
399 metagenomic sequencing approach as Torque Teno virus has been investigated as a predictive  
400 marker for post-transplant complications (Wohlfarth et al., 2018).

401

#### 402 **Quality control of reads before Centrifuge analysis**

403 Although quality control of raw reads is imperative for variant calling and genome assembly and  
404 can speed up downstream taxonomic and functional analyses by reducing the total number of  
405 reads analyzed, it takes considerable computing time and resources. In this study, we observed  
406 limited benefits of quality control regarding accurately identifying and quantifying the  
407 abundance of the bacteria in the mock community. However, we did see an elimination of a  
408 single false positive organism estimated at 2.3% relative abundance with quality control. Quality  
409 controlling reads from the febrile neutropenia data revealed a bias toward removing viral reads  
410 (Supplemental Table 1). Users of Centrifuge may want to weigh the limited benefits of quality  
411 controlling their data before analysis in Centrifuge versus the bias toward the removal of viral  
412 reads and time required.

413

#### 414 **Host screening with Centrifuge**

415 Despite the substantial enrichment for microbial/viral DNA that we achieved in this study (20-  
416 58% non-human reads, Table 2) as compared to prior studies (1% of reads) (Naccache et al.,

417 2014; Parize et al., 2017), a large proportion of reads were still identified as human. Screening  
418 host reads by alignment to the genome before analysis by Centrifuge appears to be unnecessary  
419 given Centrifuge's ability to classify reads to the host organism during analysis. For example, in  
420 patient 2 we were able to identify Human Parvovirus B19 when we used the "exclude TaxID"  
421 function for host screening. Because parvovirus virus integrated into the ancestral human  
422 genome during evolution (Liu et al., 2011), many Human Parvovirus B19 reads identified  
423 aligned to the human genome and were removed before analysis by Centrifuge. This method  
424 caused the largest reduction in the number of reads classified as Human Parvovirus B19 relative  
425 to the exclude TaxID method (Figure 6B).

426 In contrast, when the human genome was removed from the Centrifuge database, reads from the  
427 human genome derived from the ancestrally integrated parvovirus would have been misclassified  
428 as Human Parvovirus B19, with the effect that it could inflate the relative abundance estimate.

429 The "exclude TaxID" method appears to offer a balance between the other two methods: it  
430 allows both endogenous host reads and actual organism reads to be appropriately classified while  
431 saving the time and computational cost of aligning reads to a host organism before analysis.

432 Given that reference genomes can contain sequences of mixed origin due to horizontal gene  
433 transfer, endogenous and integrated microbes/viruses, and prophage in bacterial genomes,  
434 classifying reads to all available reference data and then utilizing exclude TaxID appears to be  
435 the best compromise of speed and specificity for eliminating host reads from results.

436

437

438 **Conclusion**

439 In summary, our analyses suggest that Centrifuge, open-source software for fast taxonomic  
440 classification, provides accurate quantification of clinically relevant organisms/viruses in  
441 metagenomes using minimal compute time and resources. Centrifuge's ability to quickly assign  
442 taxonomy to reads, accurately represent the abundance of organisms such as viruses, and  
443 sidestep read quality control and host-screening make it a good candidate for classifying reads of  
444 clinically relevant organisms. To this end, we have made Centrifuge and the bubble plot software  
445 used in the study available as Apps in iMicrobe (<http://imicrobe.us>) for streamlined taxonomic  
446 analysis by the public.

#### 447 **Materials and Methods**

449 These methods have been deposited into protocols.io under DOI:  
450 [dx.doi.org/10.17504/protocols.io.wjdfci6](https://doi.org/10.17504/protocols.io.wjdfci6)

#### 452 **Ethics Statement**

454 The Institutional Review Board at the University of Arizona (project #1505826794) approved the  
455 human subjects research. Informed consent was obtained from febrile neutropenia patients.  
456 Whole blood was collected from patients that developed febrile neutropenia during their  
457 treatment at the University of Arizona Cancer Center. Data obtained from the first three patients  
458 collected as part of a more extensive study were used here. All three patients were being treated  
459 for leukemia or lymphoma at the time of their febrile neutropenia diagnosis.

#### 460 **Binary mixtures of bacteria**

462 The binary mixtures were described previously (Watts et al., 2017). Briefly, four species  
463 of bacteria were used to create three binary mixtures representing: (1) difficult to discriminate  
464 species with divergent clinical impact (*Escherichia coli* versus *Shigella flexneri*); (2) Gram-

465 positive species (*Staphylococcus saprophyticus* versus *Streptococcus pyogenes*); and (3) Gram-  
466 positive versus Gram-negative species (*E. coli* versus *S. saprophyticus*). DNA from the bacteria  
467 were purchased from the American Type Culture Collection (Manassas, Va, USA) and mixed in  
468 pairs so that each species represented 99.9, 99, 90, 50, 10, 1, and 0.1% of the total sample.  
469 Samples were sequenced as described below, and the sequence data deposited to the NCBI  
470 Sequence Read Archive under accessions: SRX3154186-SRX3154219 in project accession  
471 PRJNA401033.

472

### 473 **Staggered mock bacterial community**

474 The mock bacterial community (BEI Resources, Manassas, VA, USA, National Institute  
475 Allergy and Infectious Diseases, National Institutes of Health, as part of the Human Microbiome  
476 Project: Genomic DNA from Microbial Mock Community B (Staggered, High Concentration),  
477 v5.2H, for metagenomic shotgun sequencing, HM-277D) consisted of 20 bacterial species  
478 created as part of the Human Microbiome Project with specific staggered 16S rRNA gene  
479 abundances for each species. Using the 16S rRNA gene copy values, along with the known 16S  
480 rRNA gene copy number in each species' genome, we calculated the number of genomes present  
481 for each species to provide an expected value for comparison to the relative abundances  
482 calculated by Centrifuge and CLARK from sequencing data. The mock community was  
483 sequenced as described below, and sequence data deposited to the NCBI Sequence Read Archive  
484 under accession: SRP115095 in project accession PRJNA397434.

485

486

### 487 **Febrile neutropenia patient blood samples**

488            Approximately five milliliters of whole blood were collected (K<sub>2</sub>EDTA BD Vacutainer  
489 tubes, catalog #367863 BD Biosciences, San Jose, CA, USA) when blood cultures were ordered  
490 for each patient and transferred for processing within 2 hours of collection. Blood samples were  
491 diluted with an equal volume of sterile phosphate buffered saline, layered on Ficoll-Paque (GE  
492 HealthCare Life Sciences, Pittsburgh, PA, USA) and centrifuged for 20 minutes at 400 x g.  
493 Plasma was carefully drawn off, sacrificing some yield to prevent drawing up monocytes, and  
494 centrifuged three more times at 50, 100, and 150 x g for 5 minutes to further remove human  
495 cells. The plasma was passed through a five-micron filter and finally centrifuged at 4000 x g.  
496 DNA was isolated from any material sedimented during the final centrifugation with a UCP Pure  
497 Pathogen kit (Qiagen Inc., Germantown, MD, USA). Isolated DNA was quantitated on a  
498 NanoDrop ND-1000 spectrophotometer at 260 nanometers (Thermo Fisher Technologies Inc.,  
499 Santa Clara, CA, USA), diluted to one nanogram/microliter, and ten nanograms used to prepare  
500 sequencing libraries as described below. Sequence data for the three patient samples were  
501 deposited to the NCBI Sequence Read Archive in project accession PRJNA521396.

502

### 503 **DNA library preparation and sequencing**

504            DNA libraries were prepared and sequenced for all samples utilizing Ion Torrent reagents  
505 and the Ion Torrent Proton sequencer (Thermo Fisher Technologies Inc., Santa Clara, CA, USA).  
506 Ten nanograms of DNA was input to the Ion Xpress Plus Fragment Library Kit (manual  
507 #MAN0009847, revC). DNA was sheared using the Ion Shear enzymatic reaction for 12 min,  
508 and Ion Xpress barcode adapters were ligated following end repair. Resulting libraries were  
509 amplified using the manufacturer supplied library amplification primers and recommended  
510 conditions. Amplified libraries were size selected to approximately 200 base pairs using E-gel

511 SizeSelect Agarose cassettes (Invitrogen, Carlsbad, CA, USA) as outlined in the Ion Xpress  
512 manual and quantitated with the Ion Universal Library quantitation kit. Equimolar amounts of  
513 the library were templated with an Ion PI Template OT2 200 kit V3. The resulting templated  
514 beads were enriched with the Ion OneTouch ES system and quantitated with the Qubit Ion  
515 Sphere Quality Control kit on a Qubit 3.0 fluorimeter (Qubit, NY, NY, USA). Enriched  
516 templated beads were loaded onto an Ion PI V2 chip and sequenced according to the  
517 manufacturer's protocol using the Ion PI Sequencing 200 kit V3. Data were processed with Ion  
518 Torrent Server software v4.4.3 to produce data files in BAM format.

519

## 520 **Read processing and quality control**

521 Sequences were converted to FASTQ format from raw BAM files with bedtools'  
522 bamtofastq (Quinlan & Hall, 2010)2.17.0, (Quinlan & Hall, 2010). FastQC ("Babraham  
523 Bioinformatics - FastQC A Quality Control tool for High Throughput Sequence Data," n.d.)  
524 v0.11.5, ("Babraham Bioinformatics - FastQC A Quality Control tool for High Throughput  
525 Sequence Data," n.d.) was used to generate sequence quality reports. FastX toolkit (Gordon &  
526 Hannon, 2010)v.0.0.14, (Gordon & Hannon, 2010) was used to perform quality control measures  
527 on FASTQ data including quality filtering, trimming, setting a minimum read length, and  
528 removal of duplicate reads. Files were converted to FASTA with FastX. Data files before and  
529 after QC were used as input to Centrifuge when testing the effect of quality control; otherwise,  
530 all files were quality controlled before analysis.

531

## 532 **Removing host contamination by aligning to the human genome**

533 To remove host (human) reads, FASTQ read files were mapped to HG38 (Genome  
534 reference consortium human genome build38) using Bowtie2 (Langmead & Salzberg, 2012)  
535 using the --very-sensitive option. Human reads were removed by alignment from patient data  
536 before the analysis in Centrifuge except when testing the effect of host screening by other  
537 methods.

538

### 539 **Centrifuge and CLARK read classification**

540 CLARK v1.1.3 (Ounit et al., 2015a) was used to classify reads to known taxa using the  
541 default CLARK database and parameters. Centrifuge v1.0.3-beta (Kim et al., 2016) was used to  
542 classify reads to known taxa with a custom database generated from 23,276 complete archaeal,  
543 bacterial, and viral genomes downloaded from Refseq in July 2017 using the centrifuge-  
544 download and centrifuge-build scripts respectively. The custom database is available at  
545 <https://github.com/hurwitzlab/NeutropenicFever>.

546

### 547 **Binary mixture Centrifuge results filtering**

548 Centrifuge abundance report results were filtered to only include organisms at the species  
549 or strain-level with a minimum of 0.1% of total reads classified and at least 0.05% abundance as  
550 calculated by Centrifuge. These settings were chosen based on the known abundances used in the  
551 mixtures. False positive was calculated by summing the relative abundances of any organism  
552 identified by Centrifuge that was not added to the mixture. Centrifuge reports read-matches to  
553 phage separately from their host species; however, no phage or prophage passed the above  
554 filters, so there was no effect on the relative abundance calculations for the binary mixtures. The

555 coefficient of determination ( $R^2$ ) was calculated based on the log of both relative abundance  
556 estimates at each known dilution.

557

#### 558 **Mock community Centrifuge results filtering**

559 Centrifuge abundance report results were filtered to only include organisms at the  
560 species or strain-level with a minimum of at least 0.005% abundance as calculated by Centrifuge  
561 and no minimum number of reads. These settings were chosen based on the known abundances  
562 calculated for the mock community which was lower than the bacterial mixtures (0.01%). In the  
563 case of the mock community, two species-specific phages were identified that passed the filters  
564 (*Pseudomonas* phage with relative abundance 1.5%, and *Staphylococcus* phage with relative  
565 abundance 0.8%). The matches to these phages were included when calculating relative  
566 abundances for the 20 organisms, but not included in the figure. The coefficient of determination  
567 ( $R^2$ ) was calculated based on the log of the relative abundance estimates for all 20 species.

568

569

#### 570 **Febrile Neutropenia Centrifuge results filtering**

571 Centrifuge abundance report results were filtered to only include organisms at the species  
572 or strain-level with a minimum of 1% of total reads classified and at least 5% abundance as  
573 calculated by Centrifuge. Similarly to the bacterial mixtures, no phage or prophage passed the  
574 filters above, so there was no effect on relative abundance calculations.

575

#### 576 **Genome coverage of suspected pathogens from febrile neutropenia patient samples**



577 To determine genome coverage, we used Bowtie2 (Langmead & Salzberg, 2012) to map  
578 FASTQ reads (with option --very-sensitive) to reference genomes for the organisms identified by  
579 Centrifuge (*Pseudomonas fluorescens* accession: NC\_012660.1, Human Parvovirus B19  
580 accession: NC\_000883.2, Torque Teno Virus accession: NC\_015783.1). Resulting BAM files  
581 were then analyzed utilizing Samtools' (v1.3.1, (Li et al., 2009) depth tool to generate coverage  
582 values and visualized in R v3.1.1 (R scripts are available here:  
583 <https://github.com/hurwitzlab/NeutropenicFever> ).

584

### 585 **Software availability**

586 To improve access to Centrifuge and the bubble chart visualizations used in this  
587 manuscript, both tools have been made available on iMicrobe (<https://www.imicrobe.us>). As a  
588 starting point, researchers may run [centrifuge-0.0.6u1](#) followed by [centrifuge-bubble-0.0.5u1](#) to  
589 reproduce the bacterial mixing results in the manuscript using the sample data provided. Source  
590 code for running centrifuge on a high-performance compute cluster is available in Github at  
591 [https://github.com/hurwitzlab/Centrifuge\\_HPC](https://github.com/hurwitzlab/Centrifuge_HPC) and analyses, scripts and visualizations are also  
592 archived at <https://github.com/hurwitzlab/NeutropenicFever>.

593

### 594 **ACKNOWLEDGMENTS**

595 We thank Drs. Jana U'Ren and Alise Ponsoero for feedback on the manuscript. We thank Dr.  
596 Marvin Slepian for constructive discussions. We thank the staff of the University of Arizona  
597 Information Technology Services for access and system support for the UA high-performance  
598 compute cluster. We thank The University of Arizona BIO5 Statistical Consulting Services for  
599 advice on calculating the coefficients of determination.

600

601 **FUNDING**

602 Sequence data was generated by the Genomics Shared Resource at the University of Arizona  
603 Cancer Center; supported by the Southwest Environmental Health Sciences Center, NIEHS grant  
604 ES06694, and the Arizona Cancer Center, NIH grant CA23074. James Thornton was supported  
605 by start-up funds provided by the University of Arizona Bio5 Institute. Sample collection and  
606 sequencing support were provided by a New Idea Award to George Watts from the Leukemia  
607 and Lymphoma Society.

608

609 **REFERENCES**

- 610 Ashton, P. M., Peters, T., Ameh, L., McAleer, R., Petrie, S., Nair, S., ... Dallman, T. (2015). Whole  
611 Genome Sequencing for the Retrospective Investigation of an Outbreak of Salmonella Typhimurium  
612 DT 8. *PLoS Currents*, 7.  
613 <https://doi.org/10.1371/currents.outbreaks.2c05a47d292f376afc5a6fcdd8a7a3b6>
- 614 Babraham Bioinformatics - FastQC A Quality Control tool for High Throughput Sequence Data. (n.d.).  
615 Retrieved May 23, 2018, from <https://www.bioinformatics.babraham.ac.uk/projects/fastqc/>
- 616 Bazinet, A. L., & Cummings, M. P. (2012). A comparative evaluation of sequence classification  
617 programs. *BMC Bioinformatics*, 13, 92.
- 618 de Villiers, E.-M., Borkosky, S. S., Kimmel, R., Gunst, K., & Fei, J.-W. (2011). The diversity of torque  
619 teno viruses: in vitro replication leads to the formation of additional replication-competent subviral  
620 molecules. *Journal of Virology*, 85(14), 7284–7295.
- 621 Ecker, D. J., Sampath, R., Li, H., Massire, C., Matthews, H. E., Toleno, D., ... Tang, Y.-W. (2010). New  
622 technology for rapid molecular diagnosis of bloodstream infections. *Expert Review of Molecular*  
623 *Diagnostics*, 10(4), 399–415.
- 624 Frey, K. G., Herrera-Galeano, J. E., Redden, C. L., Luu, T. V., Servetas, S. L., Mateczun, A. J., ...

- 625 Bishop-Lilly, K. A. (2014). Comparison of three next-generation sequencing platforms for  
626 metagenomic sequencing and identification of pathogens in blood. *BMC Genomics*, *15*, 96.
- 627 Gordon, A., & Hannon, G. J. (2010). Fastx-toolkit. *FASTQ/A Short-Reads Preprocessing Tools*  
628 *(unpublished)* [Http://hannonlab.Cshl.Edu/fastx\\_toolkit](http://hannonlab.Cshl.Edu/fastx_toolkit).
- 629 Kim, D., Song, L., Breitwieser, F. P., & Salzberg, S. L. (2016). Centrifuge: rapid and sensitive  
630 classification of metagenomic sequences. *Genome Research*, *26*(12), 1721–1729.
- 631 Land, M., Hauser, L., Jun, S.-R., Nookaew, I., Leuze, M. R., Ahn, T.-H., ... Ussery, D. W. (2015).  
632 Insights from 20 years of bacterial genome sequencing. *Functional & Integrative Genomics*, *15*(2),  
633 141–161.
- 634 Langmead, B., & Salzberg, S. L. (2012). Fast gapped-read alignment with Bowtie 2. *Nature Methods*,  
635 *9*(4), 357–359.
- 636 Li, H., & Durbin, R. (2009). Fast and accurate short read alignment with Burrows-Wheeler transform.  
637 *Bioinformatics*, *25*(14), 1754–1760.
- 638 Li, H., Handsaker, B., Wysoker, A., Fennell, T., Ruan, J., Homer, N., ... 1000 Genome Project Data  
639 Processing Subgroup. (2009). The Sequence Alignment/Map format and SAMtools. *Bioinformatics*,  
640 *25*(16), 2078–2079.
- 641 Liu, H., Fu, Y., Xie, J., Cheng, J., Ghabrial, S. A., Li, G., ... Jiang, D. (2011). Widespread endogenization  
642 of densovirus and parvovirus in animal and human genomes. *Journal of Virology*, *85*(19), 9863–  
643 9876.
- 644 M. Burrows, D. J. W. (1994). A block-sorting lossless data compression algorithm. Retrieved from  
645 <http://citeseerx.ist.psu.edu/viewdoc/summary?doi=10.1.1.3.8069>
- 646 McIntyre, A. B. R., Ounit, R., Afshinnekoo, E., Prill, R. J., Hénaff, E., Alexander, N., ... Mason, C. E.  
647 (2017). Comprehensive benchmarking and ensemble approaches for metagenomic classifiers.  
648 *Genome Biology*, *18*(1), 182.
- 649 Mollerup, S., Friis-Nielsen, J., Vinner, L., Hansen, T. A., Richter, S. R., Fridholm, H., ... Hansen, A. J.  
650 (2016). *Propionibacterium acnes*: Disease-Causing Agent or Common Contaminant? Detection in

- 651 Diverse Patient Samples by Next-Generation Sequencing. *Journal of Clinical Microbiology*, 54(4),  
652 980–987.
- 653 Naccache, S. N., Federman, S., Veeraraghavan, N., Zaharia, M., Lee, D., Samayoa, E., ... Chiu, C. Y.  
654 (2014). A cloud-compatible bioinformatics pipeline for ultrarapid pathogen identification from next-  
655 generation sequencing of clinical samples. *Genome Research*, 24(7), 1180–1192.
- 656 Ounit, R., Wanamaker, S., Close, T. J., & Lonardi, S. (2015a). CLARK: fast and accurate classification of  
657 metagenomic and genomic sequences using discriminative k-mers. *BMC Genomics*, 16, 236.
- 658 Ounit, R., Wanamaker, S., Close, T. J., & Lonardi, S. (2015b). CLARK: fast and accurate classification of  
659 metagenomic and genomic sequences using discriminative k-mers. *BMC Genomics*, 16, 236.
- 660 Parize, P., Muth, E., Richaud, C., Gratigny, M., Pilmis, B., Lamamy, A., ... Eloit, M. (2017). Untargeted  
661 next-generation sequencing-based first-line diagnosis of infection in immunocompromised adults: a  
662 multicentre, blinded, prospective study. *Clinical Microbiology and Infection: The Official  
663 Publication of the European Society of Clinical Microbiology and Infectious Diseases*.  
664 <https://doi.org/10.1016/j.cmi.2017.02.006>
- 665 Park, H. J., Na, S., Park, S. Y., Moon, S. M., Cho, O.-H., Park, K.-H., ... Choi, S.-H. (2011). Clinical  
666 significance of *Propionibacterium acnes* recovered from blood cultures: analysis of 524 episodes.  
667 *Journal of Clinical Microbiology*, 49(4), 1598–1601.
- 668 Quick, J., Loman, N. J., Duraffour, S., Simpson, J. T., Severi, E., Cowley, L., ... Carroll, M. W. (2016).  
669 Real-time, portable genome sequencing for Ebola surveillance. *Nature*, 530(7589), 228–232.
- 670 Quinlan, A. R., & Hall, I. M. (2010). BEDTools: a flexible suite of utilities for comparing genomic  
671 features. *Bioinformatics*, 26(6), 841–842.
- 672 Rosen, G. L., Reichenberger, E. R., & Rosenfeld, A. M. (2011). NBC: the Naive Bayes Classification tool  
673 webserver for taxonomic classification of metagenomic reads. *Bioinformatics*, 27(1), 127–129.
- 674 Schmieder, R., & Edwards, R. (2011). Fast identification and removal of sequence contamination from  
675 genomic and metagenomic datasets. *PloS One*, 6(3), e17288.
- 676 Snitkin, E. S., Zelazny, A. M., Thomas, P. J., Stock, F., NISC Comparative Sequencing Program Group,

- 677 Henderson, D. K., ... Segre, J. A. (2012). Tracking a hospital outbreak of carbapenem-resistant  
678 *Klebsiella pneumoniae* with whole-genome sequencing. *Science Translational Medicine*, 4(148),  
679 148ra116.
- 680 van Walraven, C., & Wong, J. (2014). Independent influence of negative blood cultures and bloodstream  
681 infections on in-hospital mortality. *BMC Infectious Diseases*, 14, 36.
- 682 Watts, G. S., Youens-Clark, K., Slepian, M. J., Wolk, D. M., Oshiro, M. M., Metzger, G. S., ... Hurwitz,  
683 B. L. (2017). 16S rRNA gene sequencing on a benchtop sequencer: accuracy for identification of  
684 clinically important bacteria. *Journal of Applied Microbiology*, 123(6), 1584–1596.
- 685 Wilson, M. R., Naccache, S. N., Samayoa, E., Biagtan, M., Bashir, H., Yu, G., ... Chiu, C. Y. (2014).  
686 Actionable diagnosis of neuroleptospirosis by next-generation sequencing. *The New England*  
687 *Journal of Medicine*, 370(25), 2408–2417.
- 688 Wohlfarth, P., Leiner, M., Schoergenhofer, C., Hopfinger, G., Goerzer, I., Puchhammer-Stoeckl, E., &  
689 Rabitsch, W. (2018). Torquetenovirus Dynamics and Immune Marker Properties in Patients  
690 Following Allogeneic Hematopoietic Stem Cell Transplantation: A Prospective Longitudinal Study.  
691 *Biology of Blood and Marrow Transplantation: Journal of the American Society for Blood and*  
692 *Marrow Transplantation*, 24(1), 194–199.
- 693 Wong, V., Levi, K., Baddal, B., Turton, J., Boswell, T.C. (2011). Spread of *Pseudomonas fluorescens* Due  
694 to Contaminated Drinking Water in a Bone Marrow Transplant Unit. *Journal of Clinical*  
695 *Microbiology*, 49(6), 2093-2096.
- 696 Wood, D. E., & Salzberg, S. L. (2014). Kraken: ultrafast metagenomic sequence classification using exact  
697 alignments. *Genome Biology*, 15(3), R46.

698  
699  
700  
701  
702  
703  
704

705

706

707

708

709

710

711

712

713 **SUPPORTING INFORMATION**

714

715 **S1. Quality Control Reduction of Reads**

bioRxiv preprint doi: <https://doi.org/10.1101/549477>; this version posted February 14, 2019. The copyright holder for this preprint (which was not certified by peer review) is the author/funder, who has granted bioRxiv a license to display the preprint in perpetuity. It is made available under aCC-BY 4.0 International license.

Organism

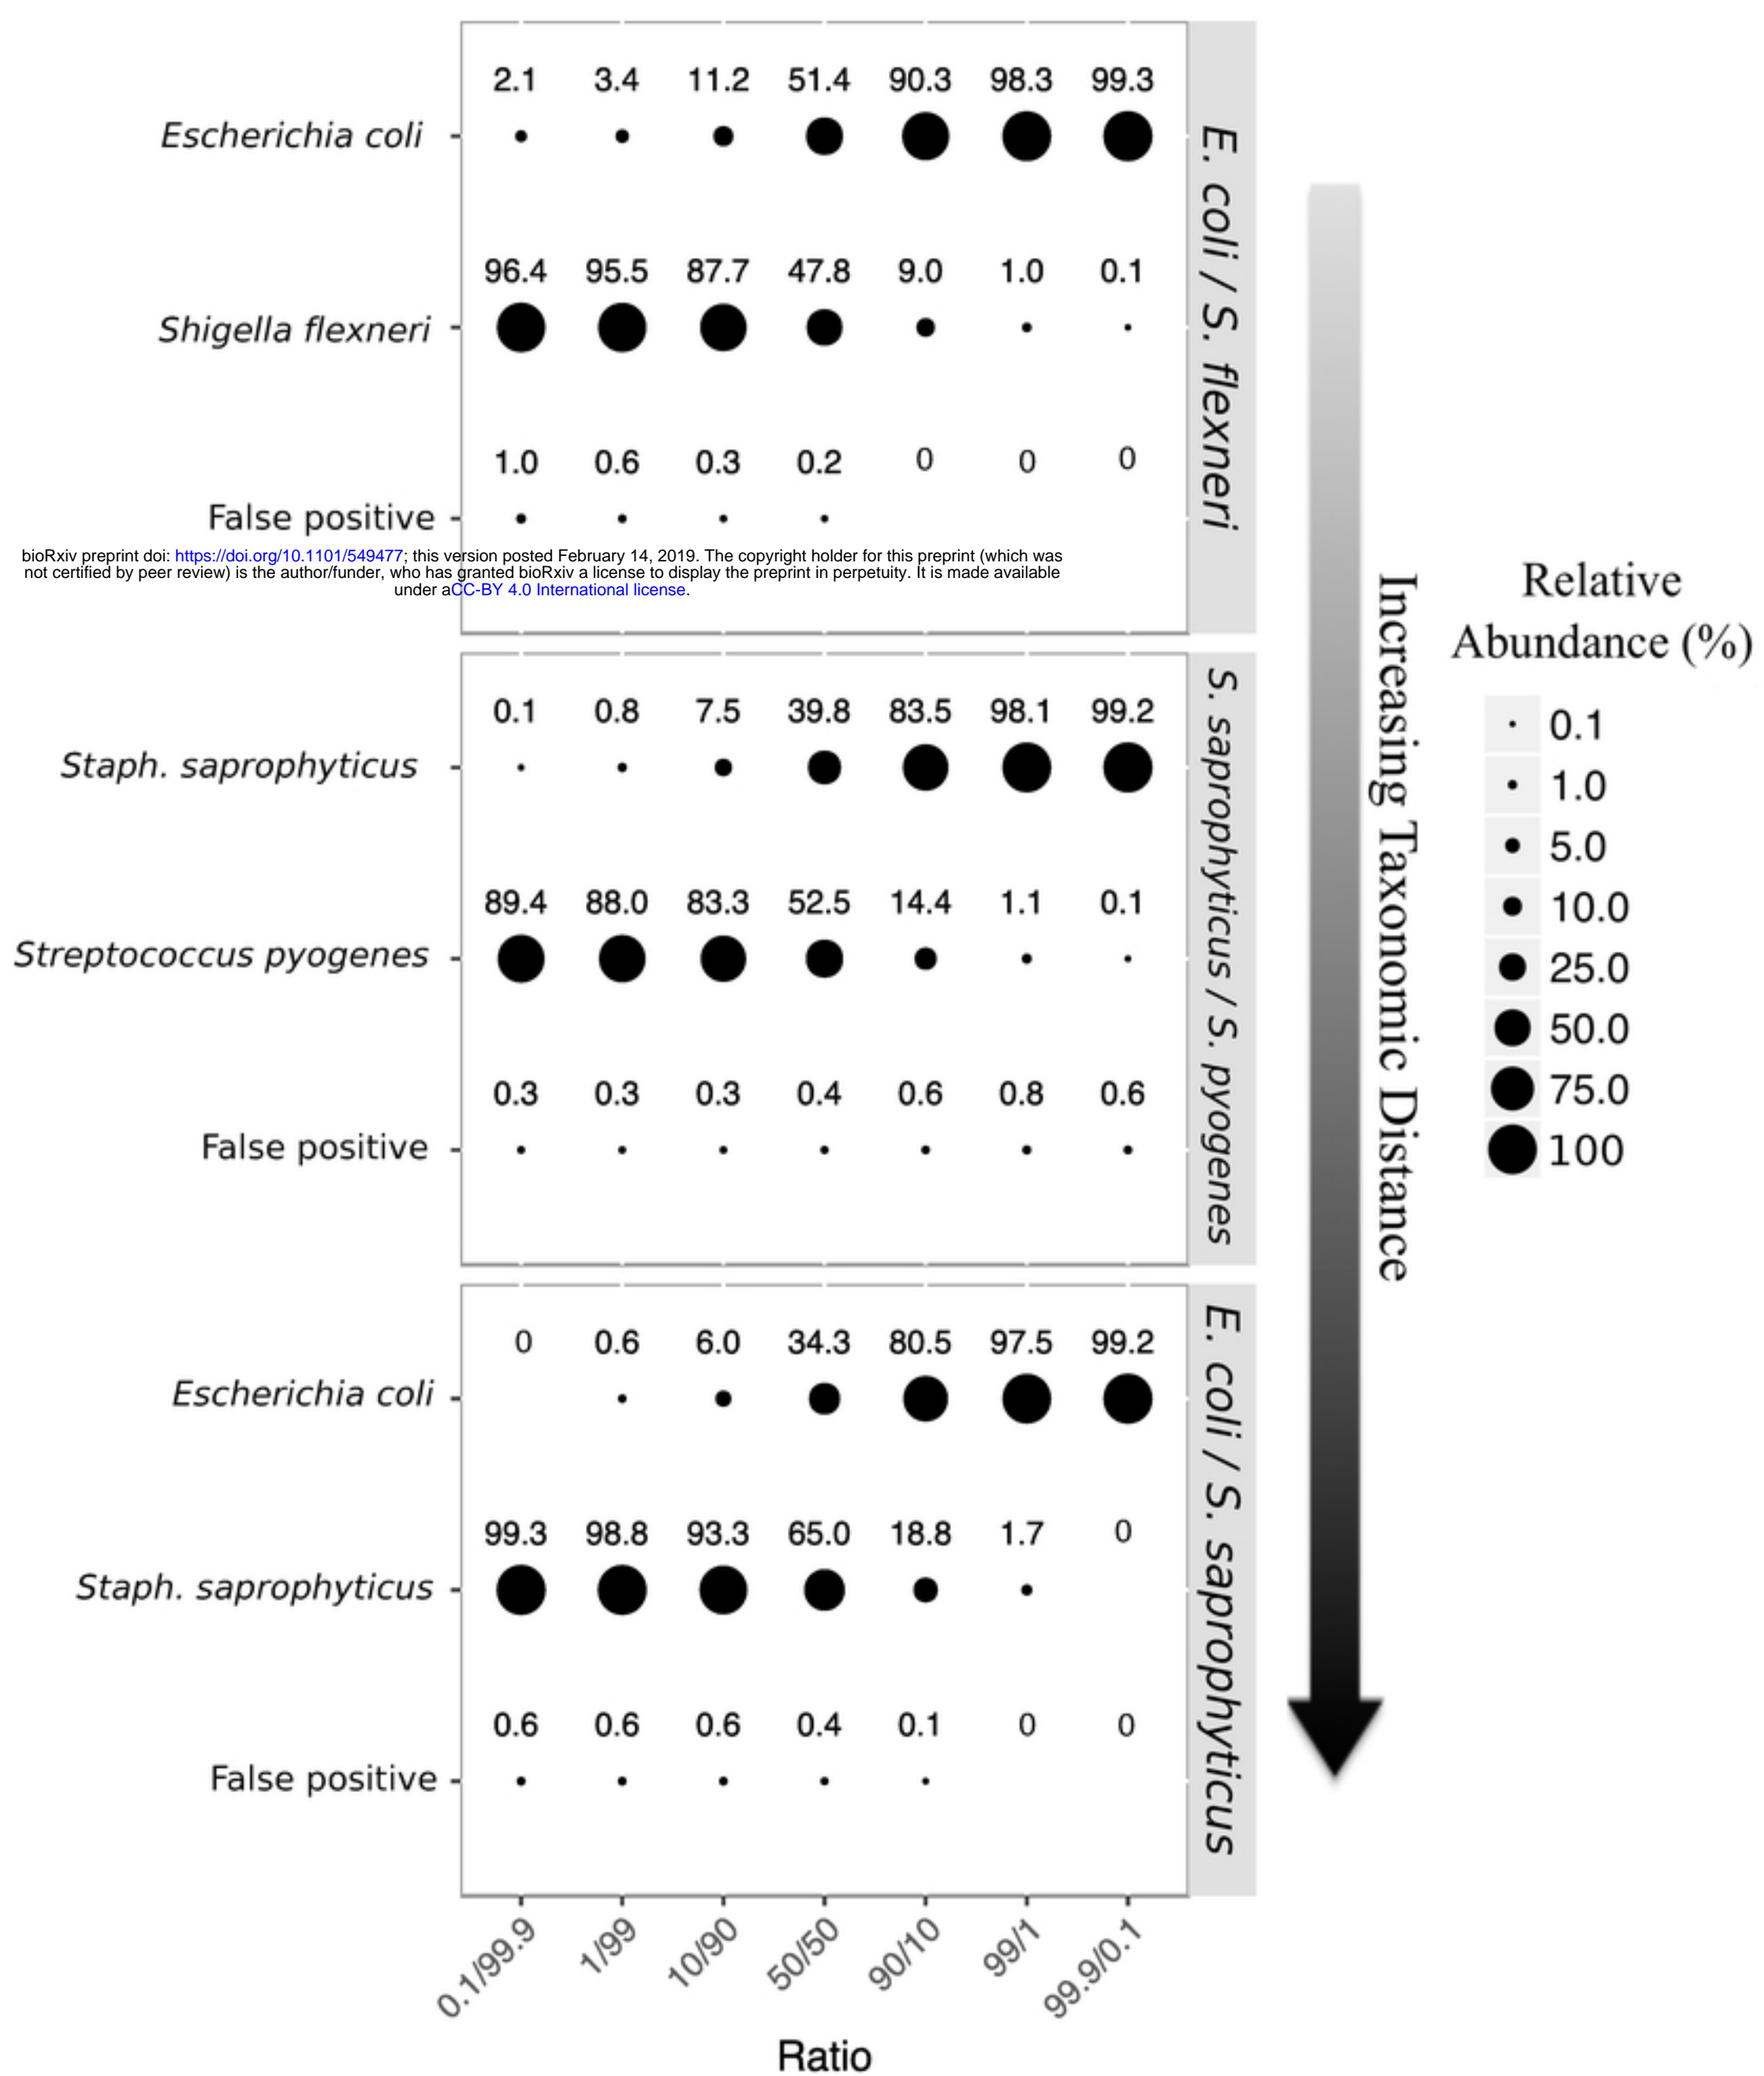

Figure 1



● Centrifuge:  $R^2 = 0.96$

▲ CLARK:  $R^2 = 0.97$

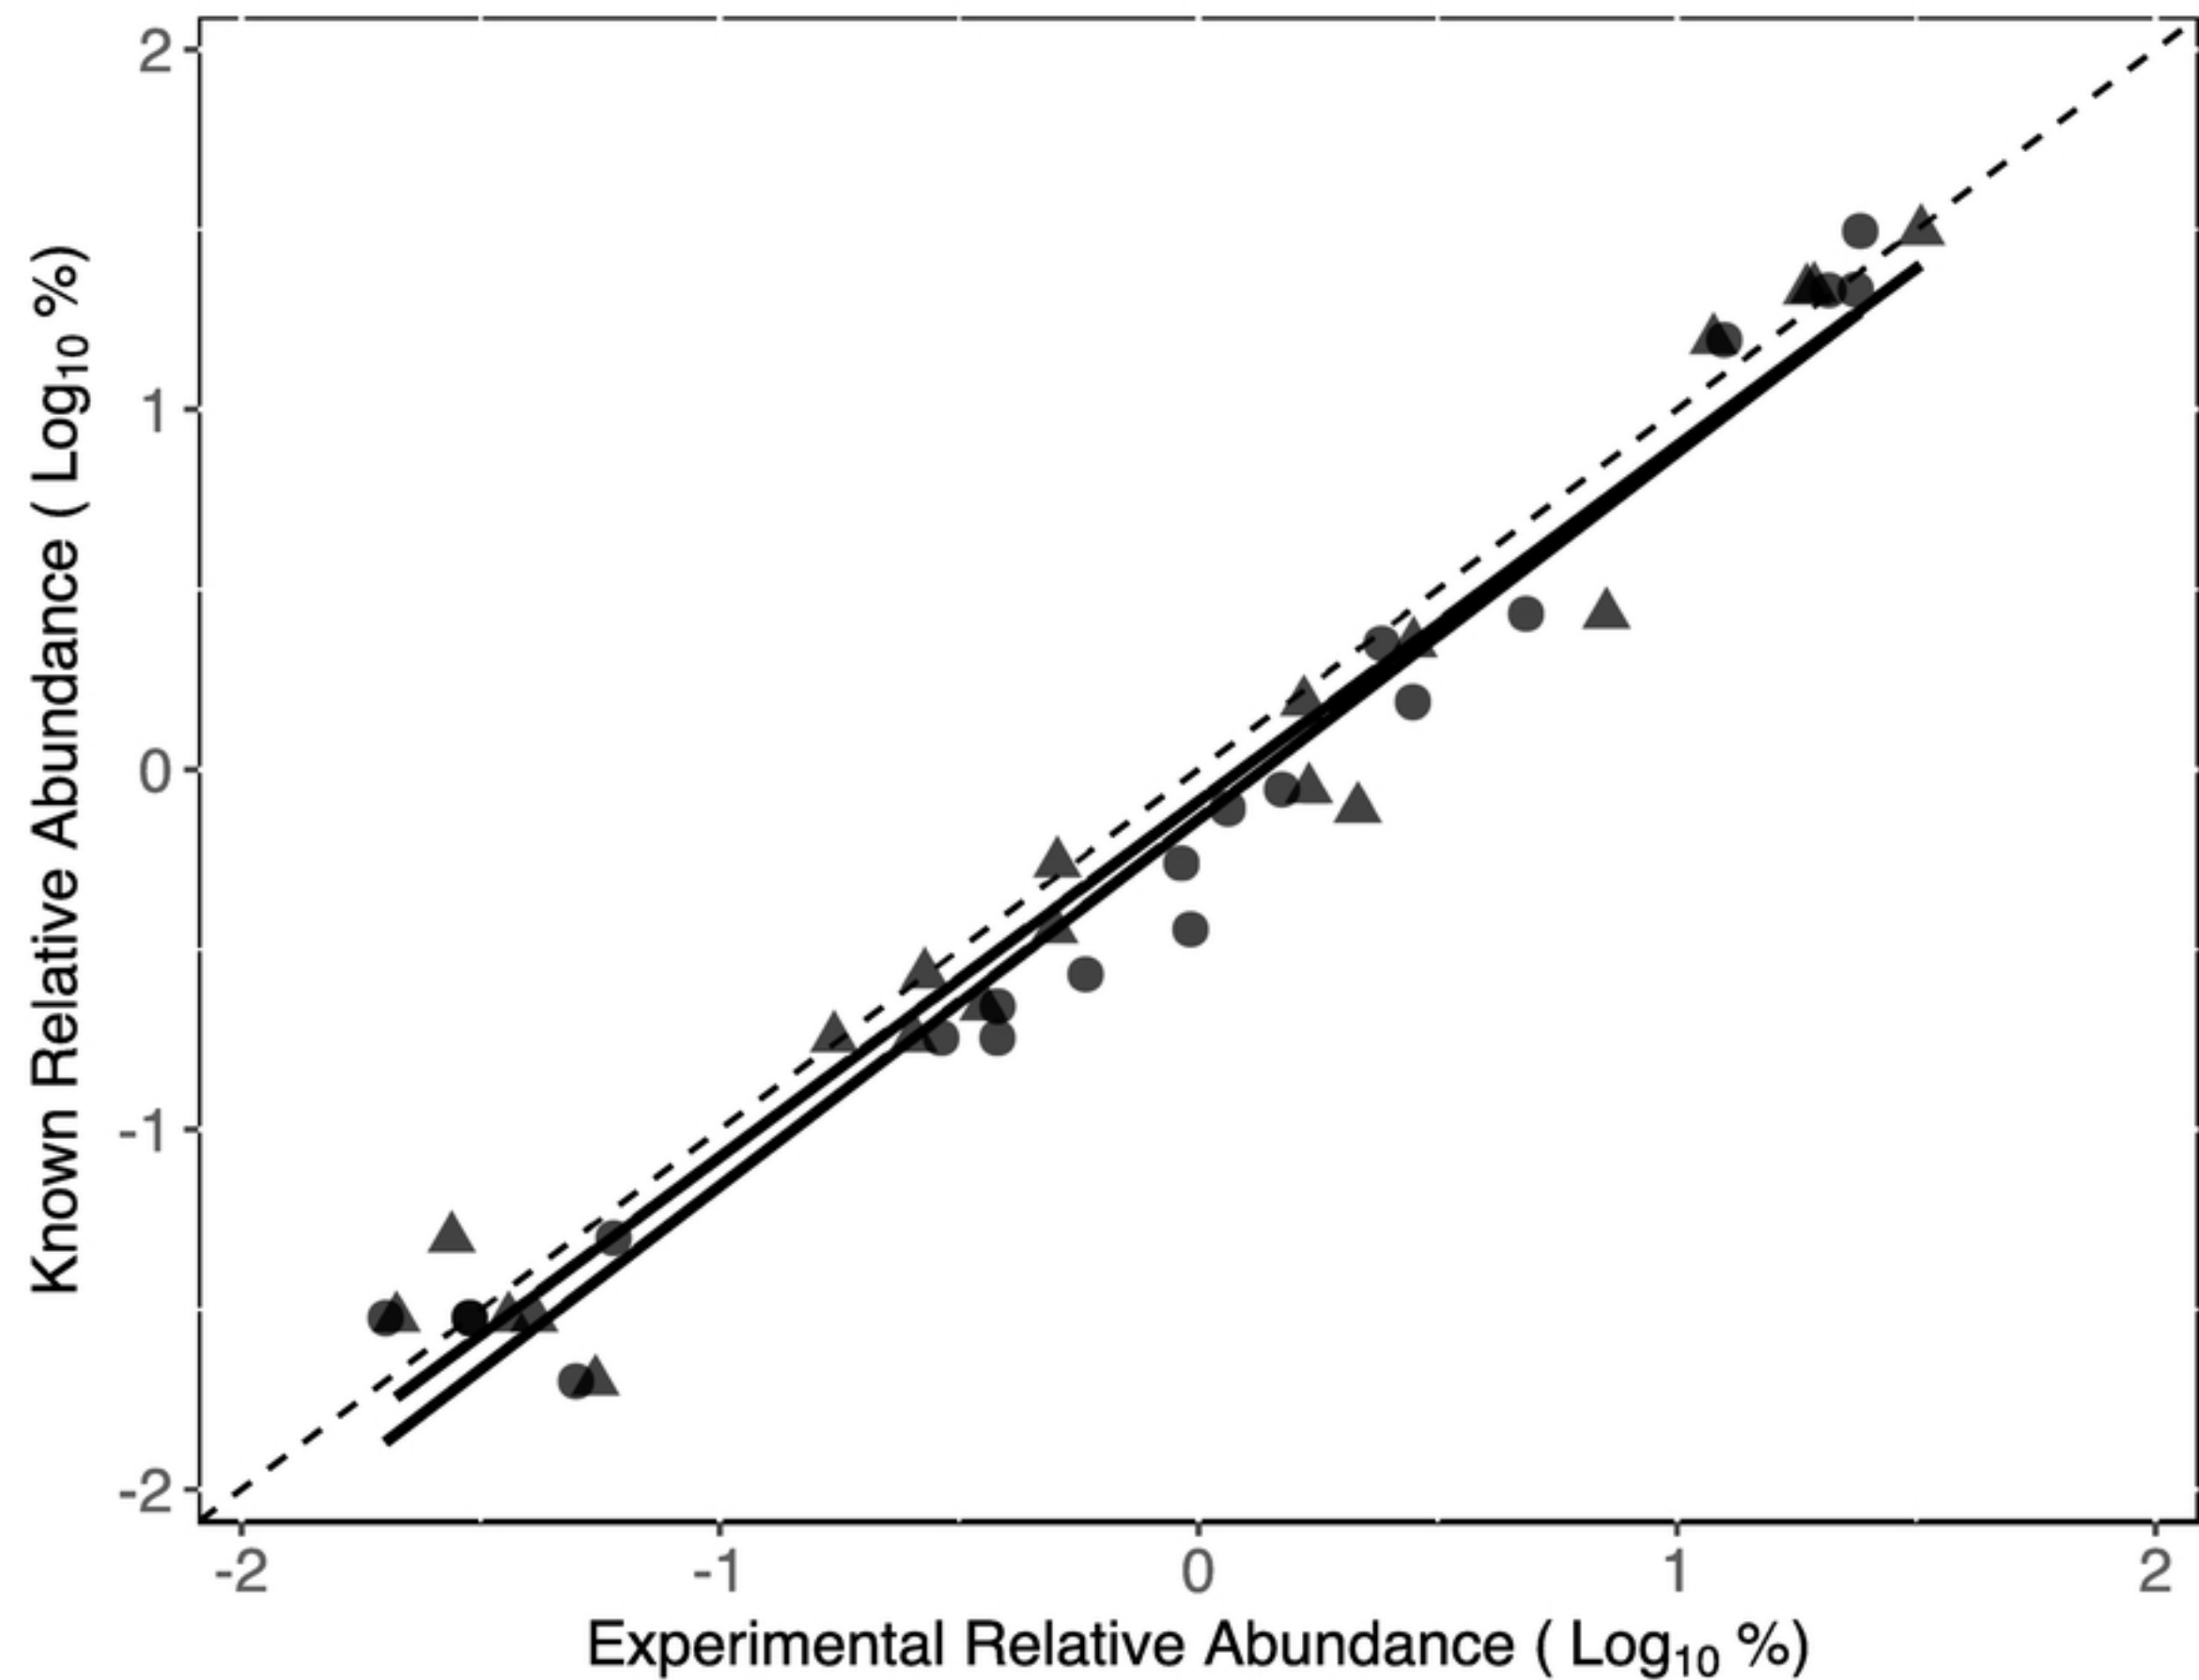

Figure 2



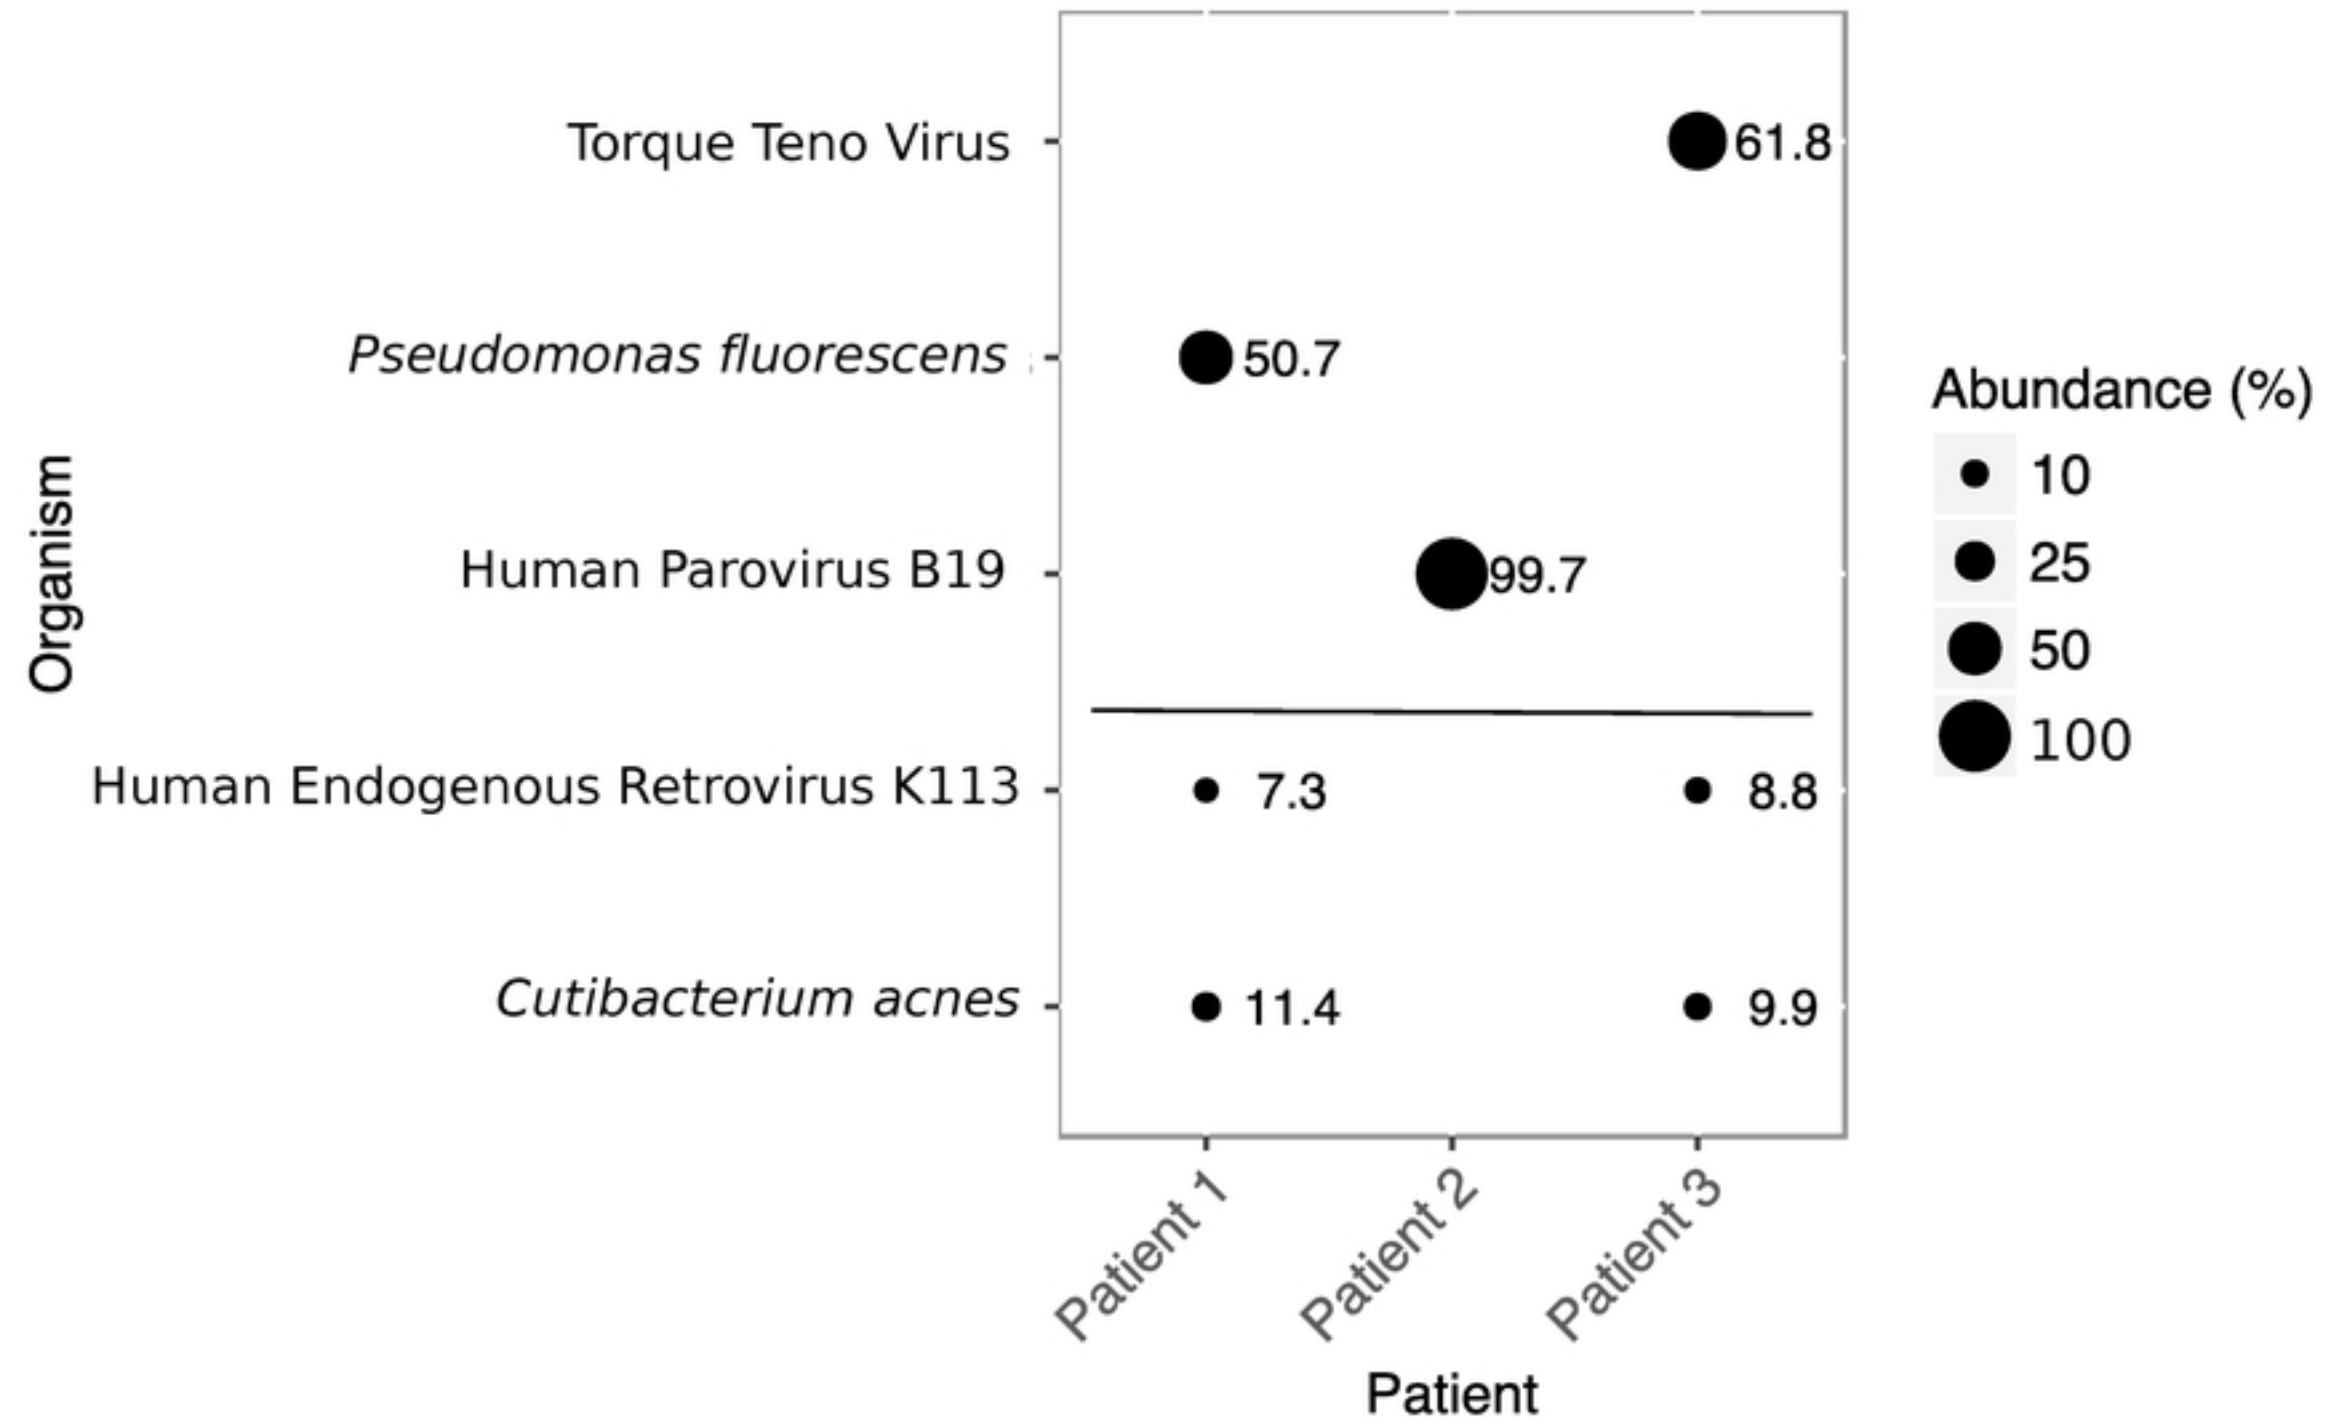

Figure 3

# Patient 1: *Pseudomonas fluorescens*

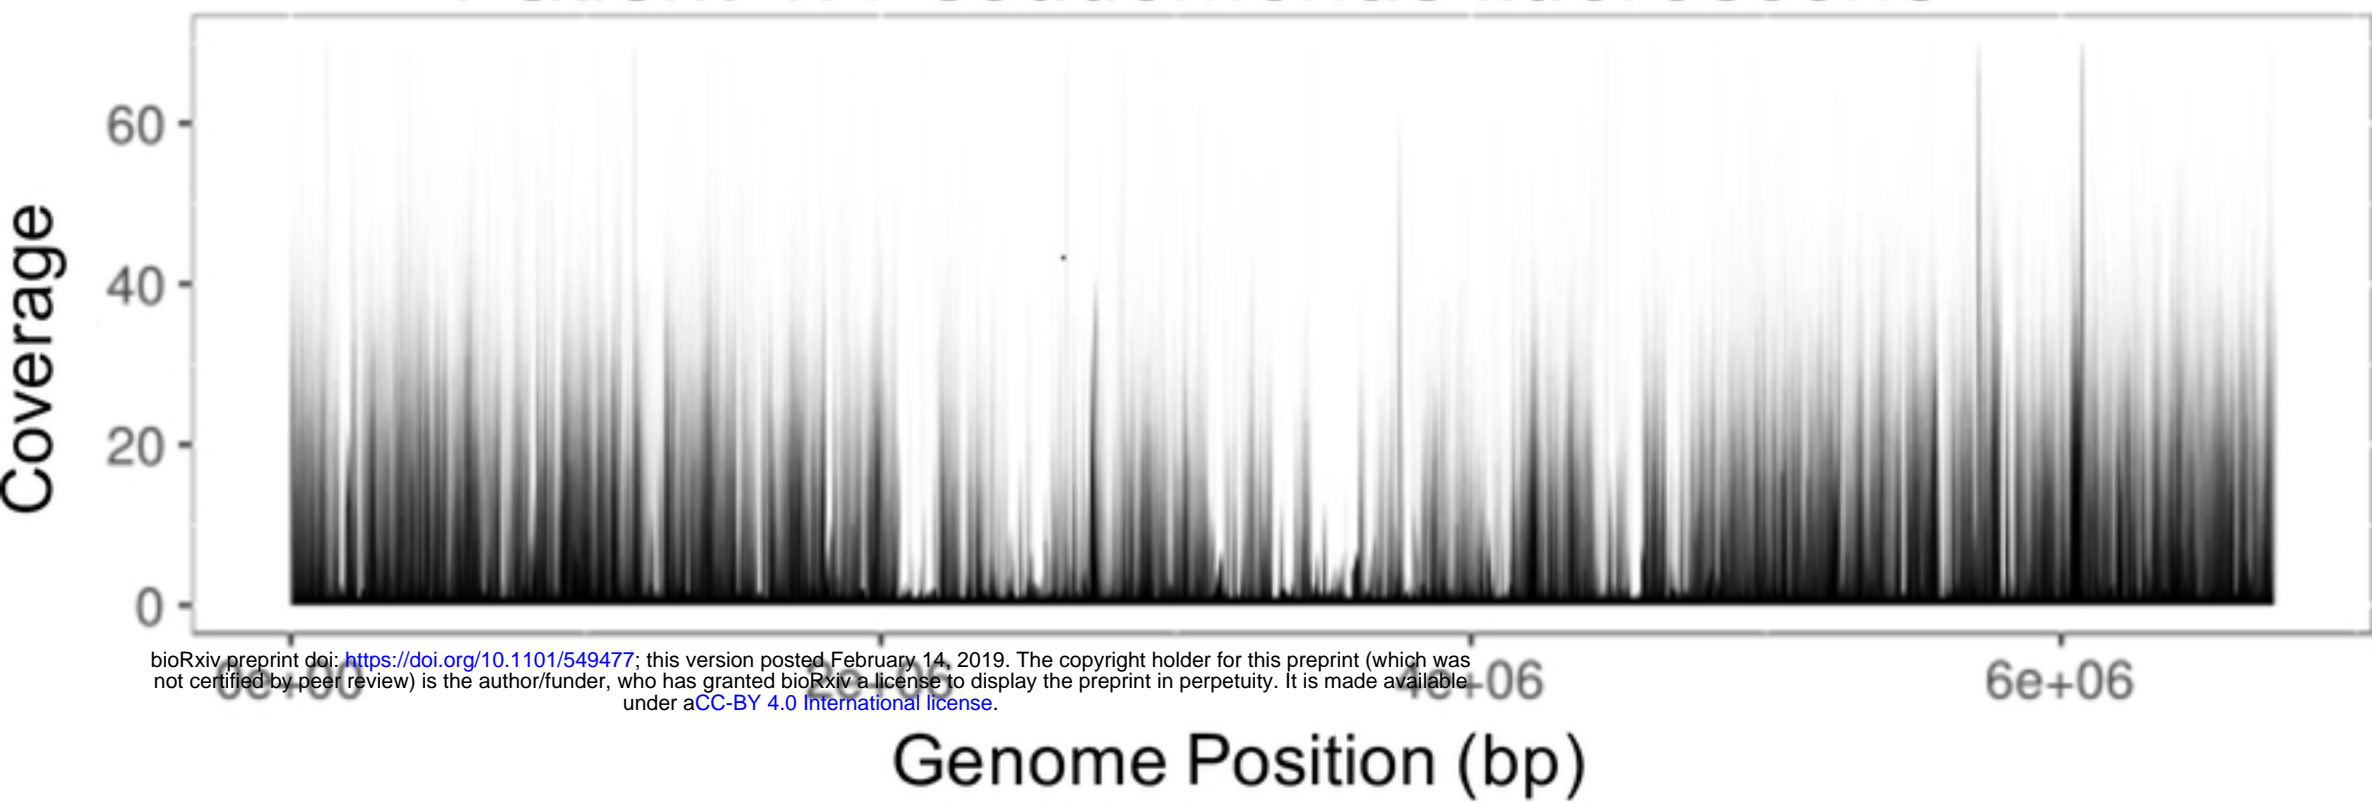

# Patient 2: Human Parvovirus

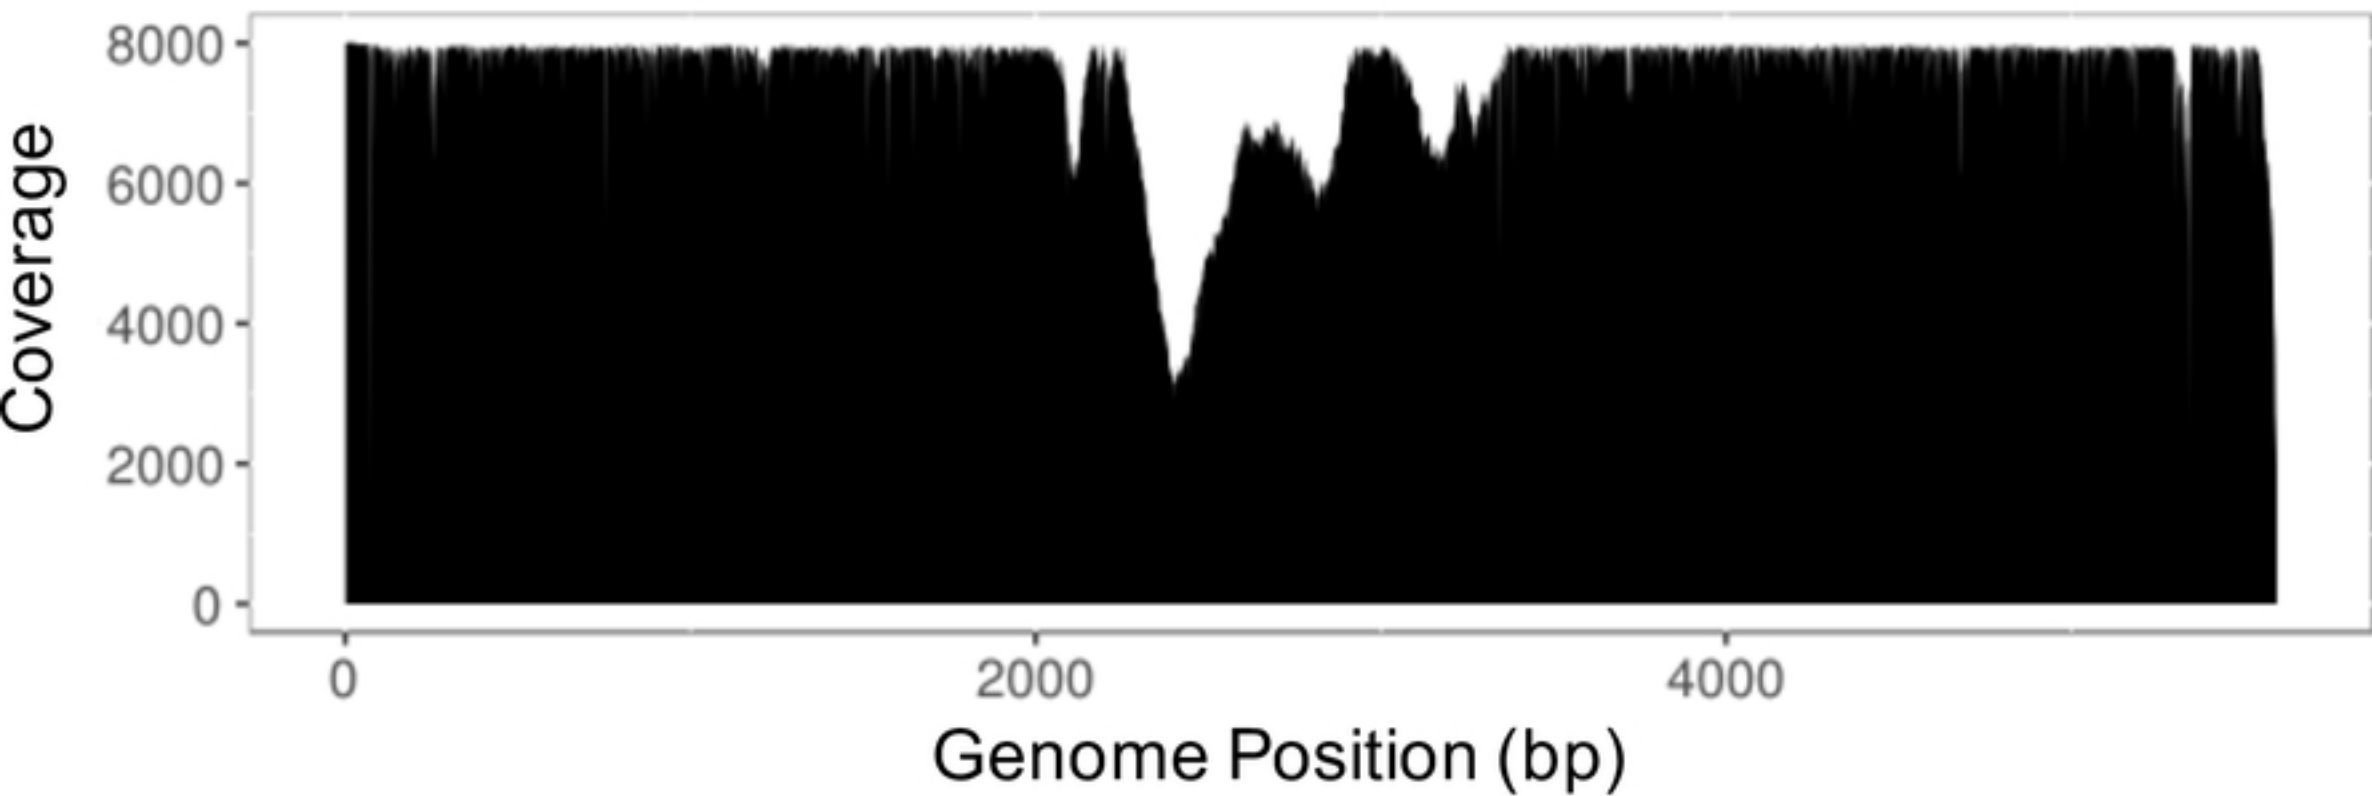

# Patient 3: Torque Teno Virus

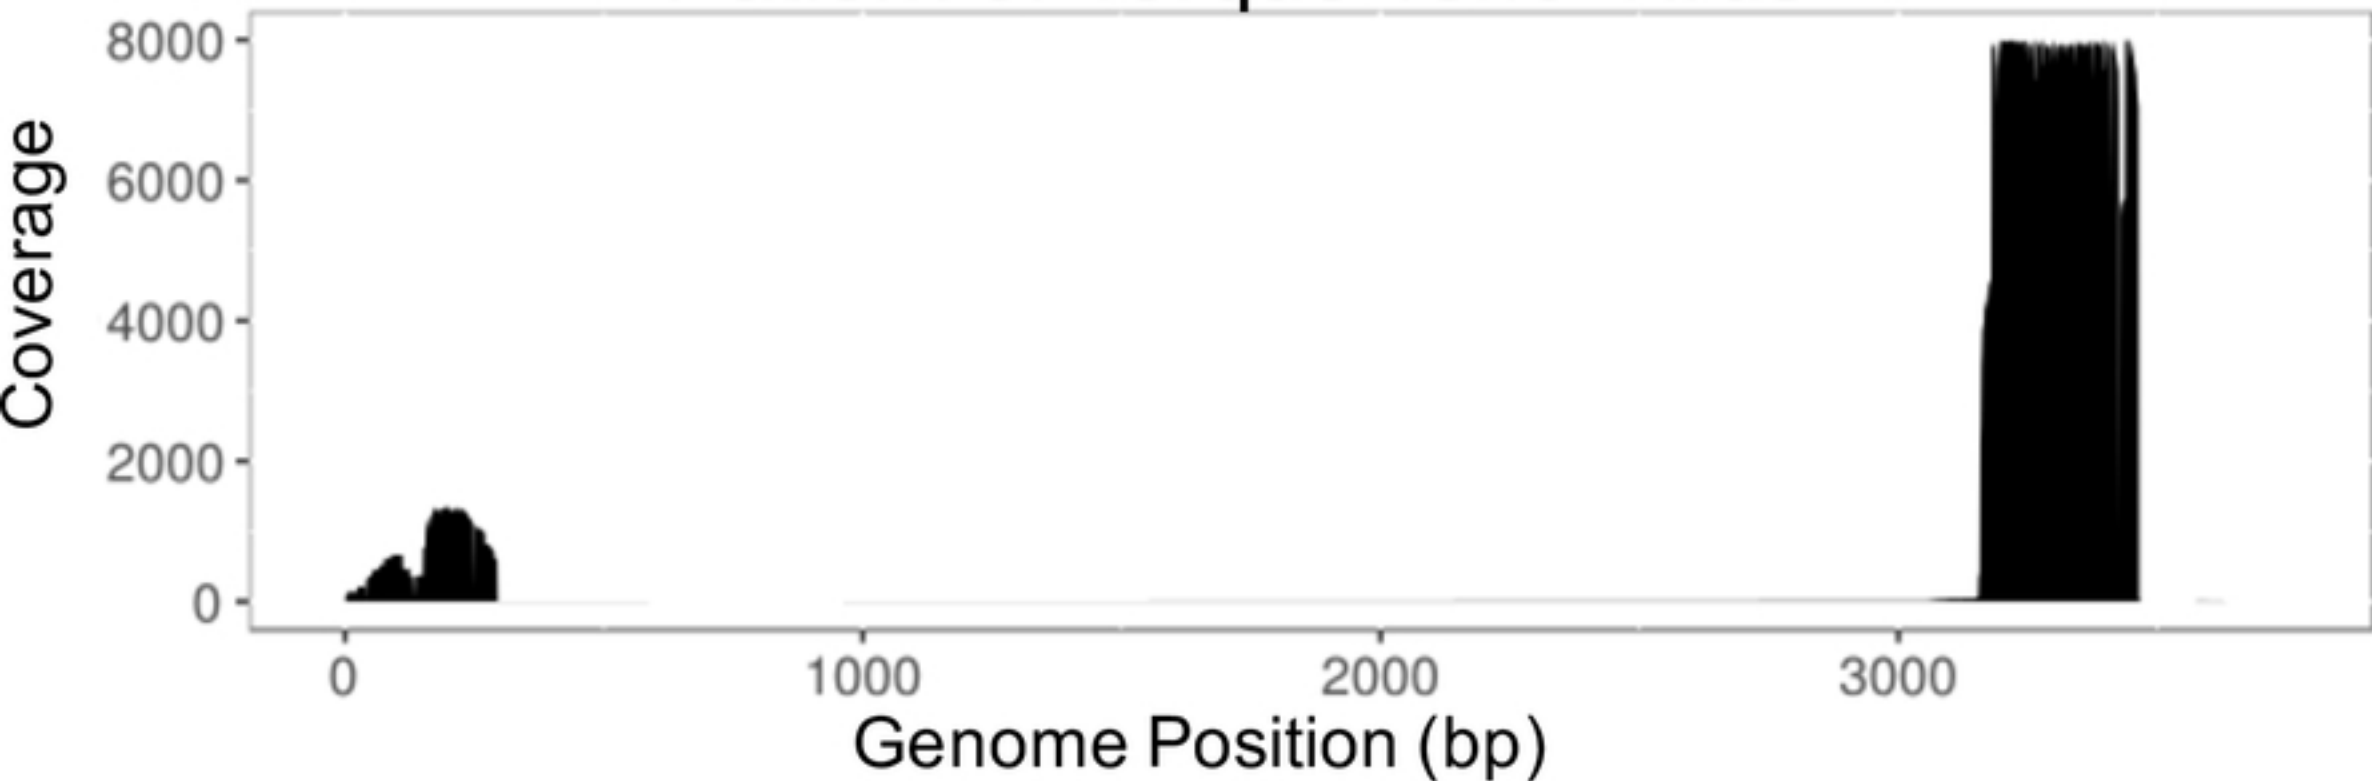

Figure 4

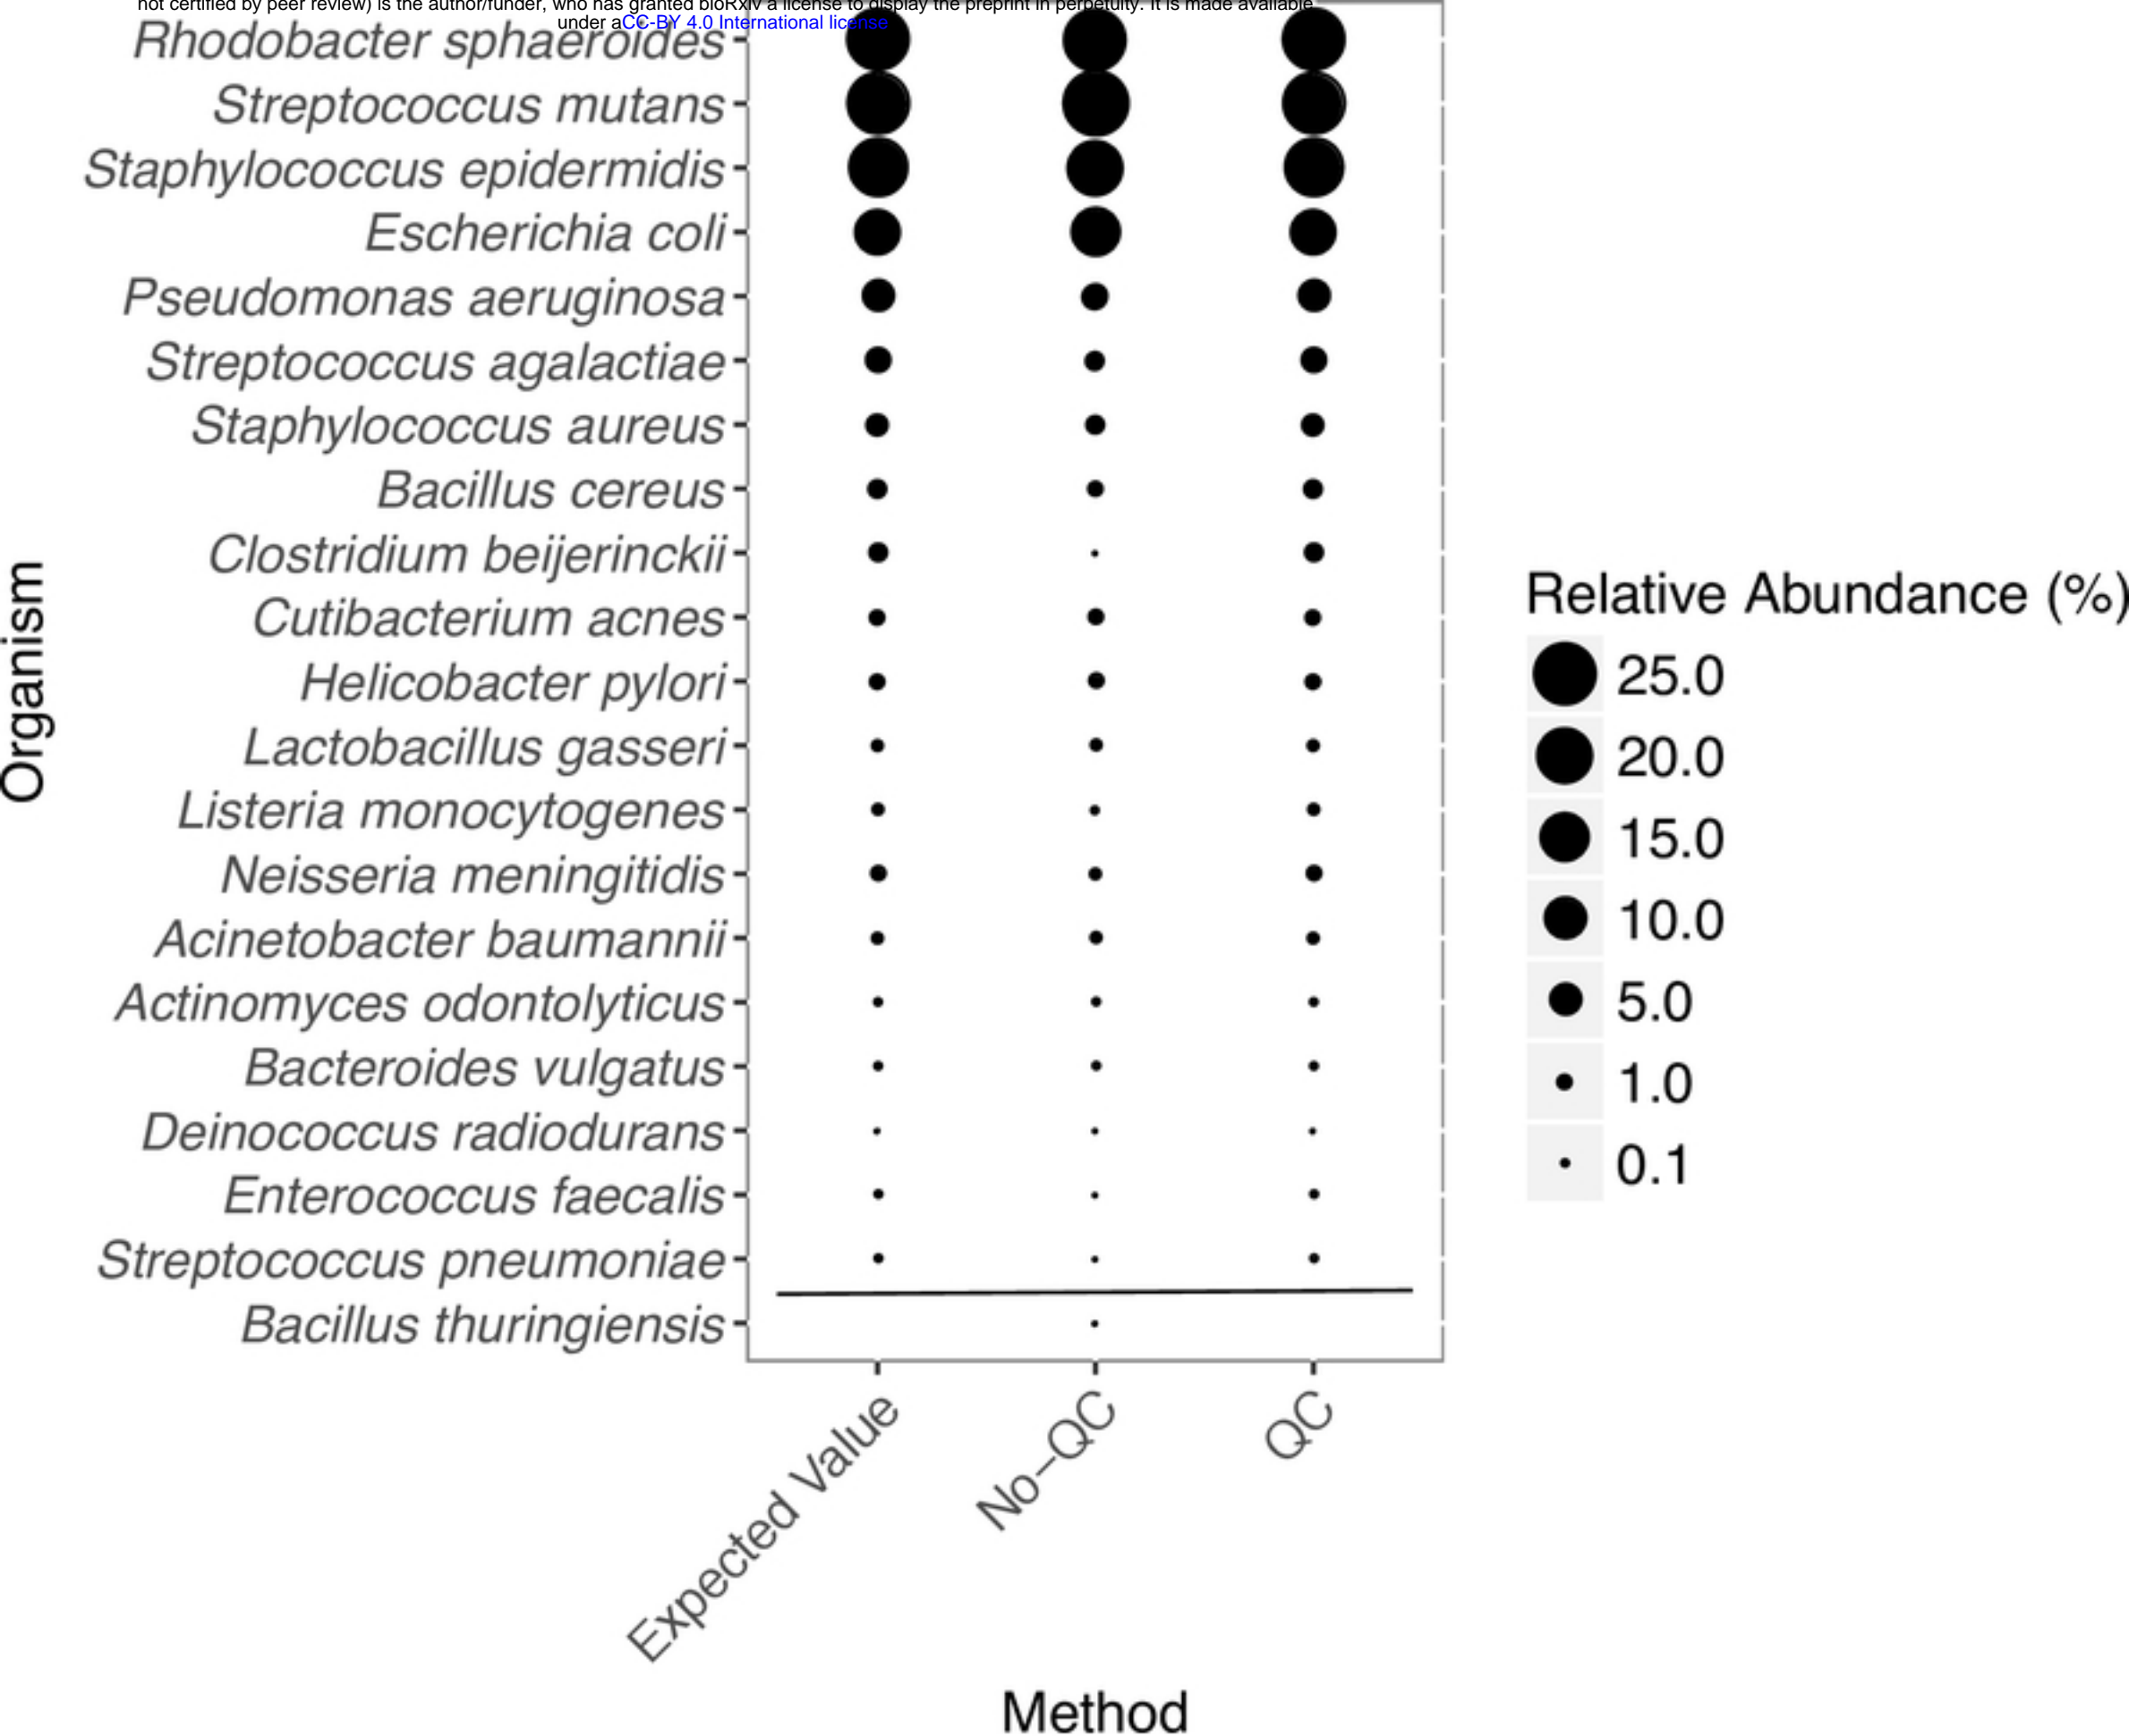

Figure 5

**A** Classification Type:  Human  Microbial  Unknown

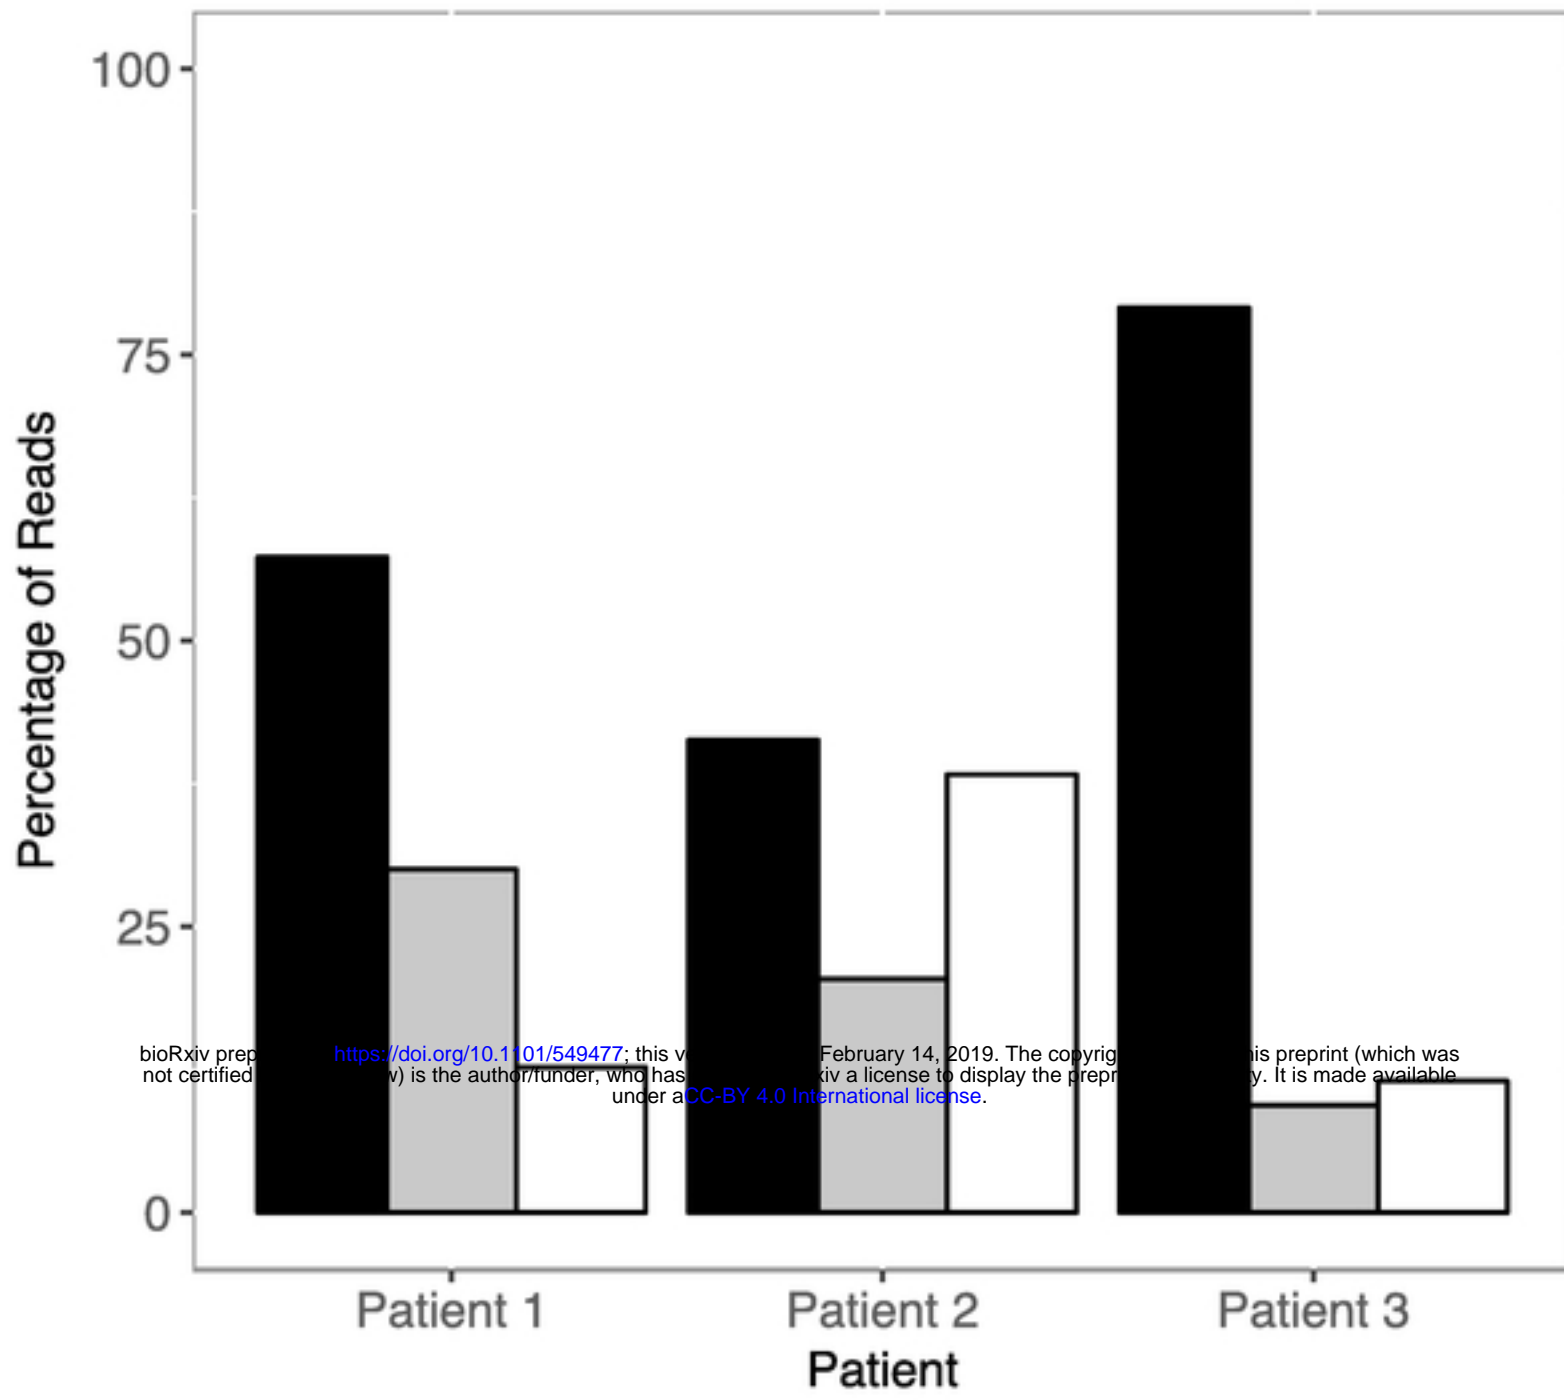

**B** Human Screening Method:  Exclude by TaxID  Read Alignment  Removed from DB

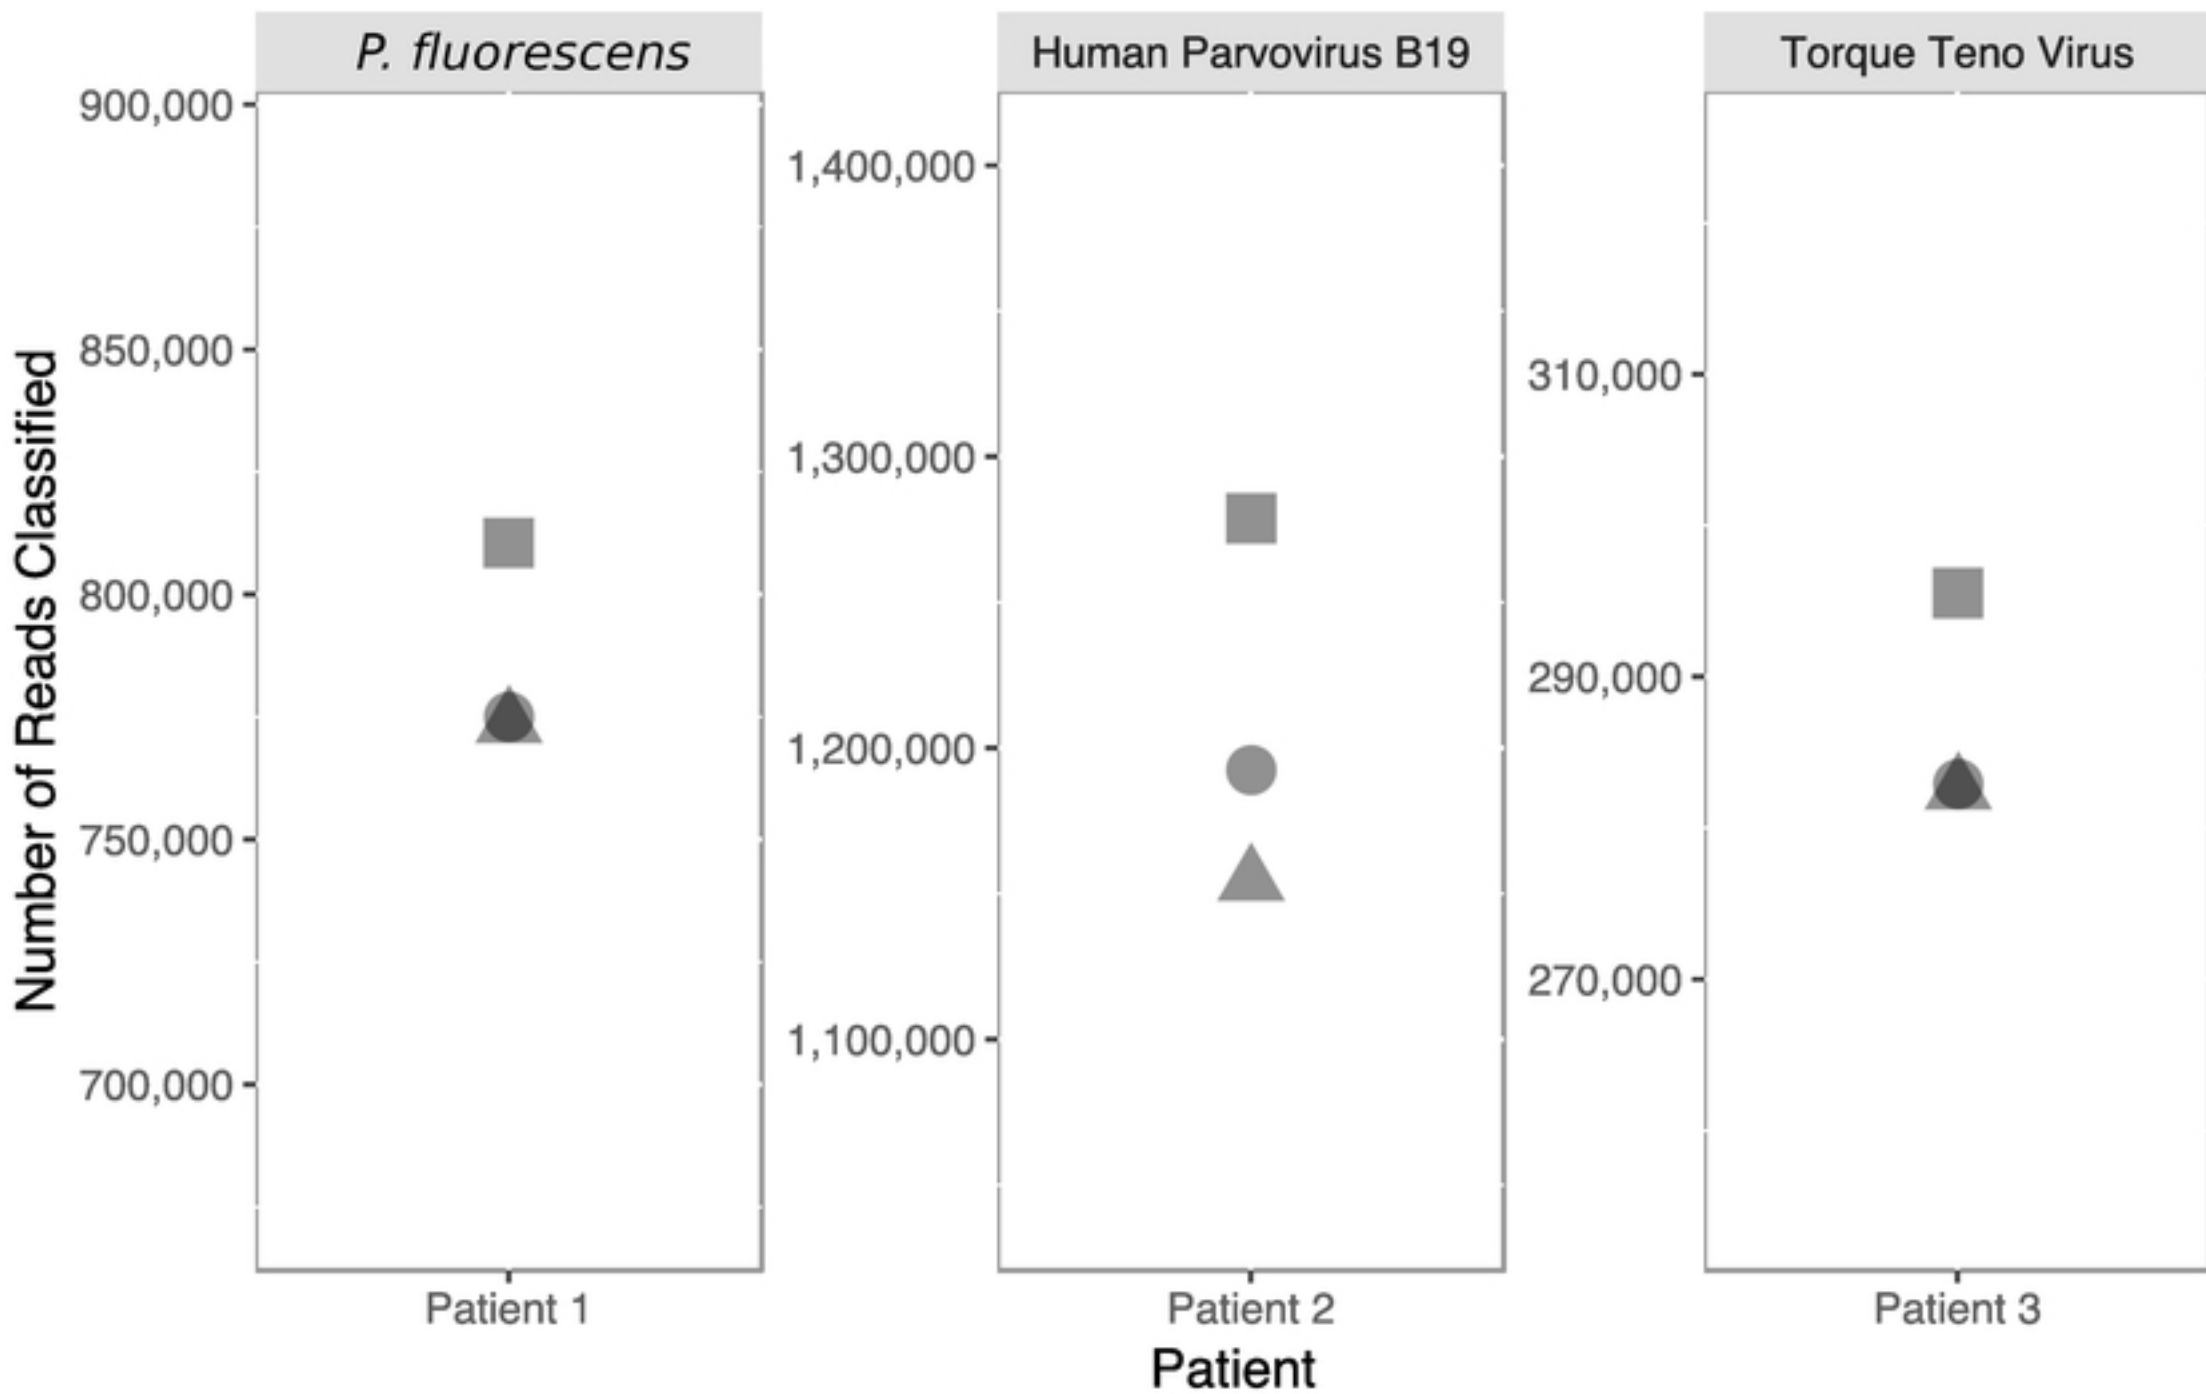

Figure 6
